# Supplementary material
Source: publisher site journal article supplement (https://www.spandidos-publications.com/5683/downloadSupplementary)
Supplement: Supplementary file 1 [file downloadSupplementary]

## Sheet: mRNAncRNA-Relation
Table SIII. The co-expression of lncRNAs with mRNAs in CRC tissues.
Gene1	biotype	style	Gene2	biotype_1	style_1	interaction	Type	Abs_Value
AC009102.2	lincRNA	down	ADAMTSL3	protein_coding	down	0.908993	1	0.908993
AC010776.2	lincRNA	down	ADAMTSL3	protein_coding	down	0.85537	1	0.85537
AC011306.1	lincRNA	down	ADAMTSL3	protein_coding	down	0.85207	1	0.85207
ADAMTSL3	protein_coding	down	AF001548.1	lincRNA	down	0.857489	1	0.857489
AC087379.1	lincRNA	down	AHCYL2	protein_coding	down	0.850984	1	0.850984
AC036108.3	lincRNA	down	AKAP6	protein_coding	down	0.905614	1	0.905614
ADAMTSL3	protein_coding	down	AL356489.2	lincRNA	down	0.867808	1	0.867808
AC036108.3	lincRNA	down	ANGPTL1	protein_coding	down	0.899741	1	0.899741
AC079313.2	lincRNA	down	ANGPTL1	protein_coding	down	0.861259	1	0.861259
AL356489.2	lincRNA	down	ANGPTL1	protein_coding	down	0.855578	1	0.855578
AL513217.1	lincRNA	down	ANGPTL1	protein_coding	down	0.85116	1	0.85116
AC009102.2	lincRNA	down	ANK2	protein_coding	down	0.873918	1	0.873918
AC036108.3	lincRNA	down	ANKS1B	protein_coding	down	0.893533	1	0.893533
AC016027.1	lincRNA	down	APPL2	protein_coding	down	0.881076	1	0.881076
AC093390.1	lincRNA	down	ARPP21	protein_coding	down	0.871604	1	0.871604
AC106895.2	lincRNA	down	ARPP21	protein_coding	down	0.864367	1	0.864367
AC008938.1	lincRNA	up	ARPP21	protein_coding	down	0.860324	1	0.860324
AC135012.1	lincRNA	up	ARPP21	protein_coding	down	0.85207	1	0.85207
AC026369.1	lincRNA	up	ASCL4	protein_coding	down	0.853787	1	0.853787
AC008883.2	lincRNA	up	ATAD5	protein_coding	up	0.871541	1	0.871541
AF117829.1	lincRNA	up	ATAD5	protein_coding	up	0.867816	1	0.867816
AC025031.1	lincRNA	up	ATAD5	protein_coding	up	0.861321	1	0.861321
AC022272.1	lincRNA	up	ATAD5	protein_coding	up	0.860531	1	0.860531
AC093591.2	lincRNA	up	ATAD5	protein_coding	up	0.857328	1	0.857328
AC008507.2	lincRNA	up	ATAD5	protein_coding	up	0.855584	1	0.855584
AC010320.4	lincRNA	up	ATAD5	protein_coding	up	0.852787	1	0.852787
AC087620.1	lincRNA	up	ATAD5	protein_coding	up	0.852502	1	0.852502
AL121895.1	lincRNA	up	ATAD5	protein_coding	up	0.851982	1	0.851982
AF001548.1	lincRNA	down	ATP1A2	protein_coding	down	0.88988	1	0.88988
AC002398.2	lincRNA	down	ATP1A2	protein_coding	down	0.88834	1	0.88834
AC079313.2	lincRNA	down	ATP1A2	protein_coding	down	0.872149	1	0.872149
AL355607.1	lincRNA	down	ATP1A2	protein_coding	down	0.86181	1	0.86181
AL513217.1	lincRNA	down	ATP1A2	protein_coding	down	0.861241	1	0.861241
AC092720.2	lincRNA	down	ATP2B2	protein_coding	down	0.92836	1	0.92836
AC036108.3	lincRNA	down	ATP2B4	protein_coding	down	0.893581	1	0.893581
AC009102.2	lincRNA	down	ATP2B4	protein_coding	down	0.893241	1	0.893241
AF001548.1	lincRNA	down	ATP2B4	protein_coding	down	0.875502	1	0.875502
AC002398.2	lincRNA	down	ATP2B4	protein_coding	down	0.875317	1	0.875317
AL356489.2	lincRNA	down	ATP2B4	protein_coding	down	0.874152	1	0.874152
AL513217.1	lincRNA	down	ATP2B4	protein_coding	down	0.862642	1	0.862642
AC079313.2	lincRNA	down	ATP2B4	protein_coding	down	0.853191	1	0.853191
AC087379.1	lincRNA	down	BMP3	protein_coding	down	0.867601	1	0.867601
AC012213.3	lincRNA	up	BOLL	protein_coding	up	0.898819	1	0.898819
AC092620.2	lincRNA	up	BOLL	protein_coding	up	0.889945	1	0.889945
AL606760.3	lincRNA	up	BOLL	protein_coding	up	0.886891	1	0.886891
AC130650.1	lincRNA	up	BOLL	protein_coding	up	0.883267	1	0.883267
AC022893.3	lincRNA	up	BOLL	protein_coding	up	0.881733	1	0.881733
AC022272.1	lincRNA	up	BOLL	protein_coding	up	0.875874	1	0.875874
AC007336.1	lincRNA	up	BOLL	protein_coding	up	0.875588	1	0.875588
AC234772.2	lincRNA	up	BOLL	protein_coding	up	0.875503	1	0.875503
AC092338.3	lincRNA	up	BOLL	protein_coding	up	0.875327	1	0.875327
AC090337.1	lincRNA	up	BOLL	protein_coding	up	0.872446	1	0.872446
AC132219.1	lincRNA	up	BOLL	protein_coding	up	0.872085	1	0.872085
AC100821.2	lincRNA	up	BOLL	protein_coding	up	0.871549	1	0.871549
AC023632.5	lincRNA	up	BOLL	protein_coding	up	0.871051	1	0.871051
AC114401.1	lincRNA	up	BOLL	protein_coding	up	0.868938	1	0.868938
AL451070.1	lincRNA	up	BOLL	protein_coding	up	0.868052	1	0.868052
AC046158.1	lincRNA	up	BOLL	protein_coding	up	0.866704	1	0.866704
AL132657.2	lincRNA	up	BOLL	protein_coding	up	0.866212	1	0.866212
ALG13-AS1	lincRNA	up	BOLL	protein_coding	up	0.864167	1	0.864167
AC117834.1	lincRNA	up	BOLL	protein_coding	up	0.864024	1	0.864024
AC009299.3	lincRNA	up	BOLL	protein_coding	up	0.863475	1	0.863475
AC105760.1	lincRNA	up	BOLL	protein_coding	up	0.863385	1	0.863385
AC008277.1	lincRNA	up	BOLL	protein_coding	up	0.863322	1	0.863322
AC007938.2	lincRNA	up	BOLL	protein_coding	up	0.862317	1	0.862317
AC093817.1	lincRNA	up	BOLL	protein_coding	up	0.859663	1	0.859663
AC109466.1	lincRNA	up	BOLL	protein_coding	up	0.858595	1	0.858595
AC093788.1	lincRNA	up	BOLL	protein_coding	up	0.858296	1	0.858296
AC244131.2	lincRNA	up	BOLL	protein_coding	up	0.857068	1	0.857068
AC011997.1	lincRNA	up	BOLL	protein_coding	up	0.857052	1	0.857052
AC090739.1	lincRNA	up	BOLL	protein_coding	up	0.856261	1	0.856261
AC020704.1	lincRNA	up	BOLL	protein_coding	up	0.853079	1	0.853079
AC091047.1	lincRNA	up	BOLL	protein_coding	up	0.853034	1	0.853034
AC130651.1	lincRNA	up	BOLL	protein_coding	up	0.852062	1	0.852062
AC046195.1	lincRNA	down	BOLL	protein_coding	up	0.852021	1	0.852021
AL138963.1	lincRNA	up	BOLL	protein_coding	up	0.851039	1	0.851039
AL021395.1	lincRNA	down	BOLL	protein_coding	up	0.850643	1	0.850643
AC036108.3	lincRNA	down	BVES	protein_coding	down	0.905436	1	0.905436
AF001548.1	lincRNA	down	BVES	protein_coding	down	0.89448	1	0.89448
AC002398.2	lincRNA	down	BVES	protein_coding	down	0.892285	1	0.892285
AL513217.1	lincRNA	down	BVES	protein_coding	down	0.882825	1	0.882825
AL356489.2	lincRNA	down	BVES	protein_coding	down	0.87946	1	0.87946
AC079313.2	lincRNA	down	BVES	protein_coding	down	0.878878	1	0.878878
AL355607.1	lincRNA	down	BVES	protein_coding	down	0.864219	1	0.864219
AC009102.2	lincRNA	down	BVES	protein_coding	down	0.857734	1	0.857734
AC036108.3	lincRNA	down	CALD1	protein_coding	down	0.867212	1	0.867212
AP004147.1	lincRNA	up	CALN1	protein_coding	down	0.871547	1	0.871547
AL008638.6	lincRNA	up	CALN1	protein_coding	down	0.867104	1	0.867104
ADAMTS6	protein_coding	up	CASC15	lincRNA	up	0.866542	1	0.866542
AC022893.3	lincRNA	up	CD200R1	protein_coding	down	0.880227	1	0.880227
AC090739.1	lincRNA	up	CD200R1	protein_coding	down	0.877906	1	0.877906
AC007336.1	lincRNA	up	CD200R1	protein_coding	down	0.873212	1	0.873212
AL157938.3	lincRNA	up	CD200R1	protein_coding	down	0.86712	1	0.86712
AC117834.1	lincRNA	up	CD200R1	protein_coding	down	0.864562	1	0.864562
AC009948.2	lincRNA	up	CD200R1	protein_coding	down	0.861309	1	0.861309
AC009480.1	lincRNA	up	CD200R1	protein_coding	down	0.860986	1	0.860986
AC008883.1	lincRNA	up	CD200R1	protein_coding	down	0.860407	1	0.860407
AC130651.1	lincRNA	up	CD200R1	protein_coding	down	0.859848	1	0.859848
AF117829.1	lincRNA	up	CD200R1	protein_coding	down	0.850146	1	0.850146
AQP4-AS1	lincRNA	down	CELA1	protein_coding	down	0.970299	1	0.970299
AL355390.1	lincRNA	up	CELA1	protein_coding	down	0.949399	1	0.949399
AC016705.1	lincRNA	up	CELA1	protein_coding	down	0.943888	1	0.943888
AC073934.1	lincRNA	up	CELA1	protein_coding	down	0.94035	1	0.94035
AL157400.1	lincRNA	up	CELA1	protein_coding	down	0.936069	1	0.936069
AC026688.2	lincRNA	down	CELA1	protein_coding	down	0.929497	1	0.929497
AC139099.2	lincRNA	down	CELA1	protein_coding	down	0.925832	1	0.925832
AL772337.2	lincRNA	down	CELA1	protein_coding	down	0.923911	1	0.923911
AC004835.1	lincRNA	up	CELA1	protein_coding	down	0.921239	1	0.921239
AP002784.1	lincRNA	up	CELA1	protein_coding	down	0.920875	1	0.920875
AC145207.7	lincRNA	up	CELA1	protein_coding	down	0.920557	1	0.920557
AL008638.6	lincRNA	up	CELA1	protein_coding	down	0.915899	1	0.915899
AC126614.1	lincRNA	up	CELA1	protein_coding	down	0.906684	1	0.906684
AC018682.2	lincRNA	up	CELA1	protein_coding	down	0.902784	1	0.902784
AL354919.1	lincRNA	up	CELA1	protein_coding	down	0.902419	1	0.902419
AC084346.1	lincRNA	up	CELA1	protein_coding	down	0.902159	1	0.902159
AP004147.1	lincRNA	up	CELA1	protein_coding	down	0.894463	1	0.894463
AC109479.3	lincRNA	up	CELA1	protein_coding	down	0.893037	1	0.893037
AC122719.2	lincRNA	up	CELA1	protein_coding	down	0.891953	1	0.891953
AC012508.1	lincRNA	up	CELA1	protein_coding	down	0.885926	1	0.885926
C12orf80	lincRNA	up	CELA1	protein_coding	down	0.884511	1	0.884511
AL117328.2	lincRNA	up	CELA1	protein_coding	down	0.882878	1	0.882878
AC037441.1	lincRNA	up	CELA1	protein_coding	down	0.882025	1	0.882025
AC023906.2	lincRNA	down	CELA1	protein_coding	down	0.881306	1	0.881306
AL096828.1	lincRNA	up	CELA1	protein_coding	down	0.879658	1	0.879658
AC245884.1	lincRNA	up	CELA1	protein_coding	down	0.869157	1	0.869157
AL512604.3	lincRNA	up	CELA1	protein_coding	down	0.867606	1	0.867606
AC087855.2	lincRNA	down	CELA1	protein_coding	down	0.865083	1	0.865083
AC007920.1	lincRNA	down	CELA1	protein_coding	down	0.864395	1	0.864395
AC093390.1	lincRNA	down	CELA1	protein_coding	down	0.859971	1	0.859971
AC084064.1	lincRNA	down	CELA1	protein_coding	down	0.859427	1	0.859427
AC026469.1	lincRNA	down	CELA1	protein_coding	down	0.857148	1	0.857148
AC007193.2	lincRNA	down	CELA1	protein_coding	down	0.855467	1	0.855467
AC010907.2	lincRNA	up	CELA1	protein_coding	down	0.854926	1	0.854926
AC093642.1	lincRNA	down	CELA1	protein_coding	down	0.854876	1	0.854876
AP003064.2	lincRNA	down	CELA1	protein_coding	down	0.852516	1	0.852516
ANK3-DT	lincRNA	up	CELA1	protein_coding	down	0.852015	1	0.852015
AC114803.1	lincRNA	up	CELA1	protein_coding	down	0.851881	1	0.851881
AL162457.2	lincRNA	up	CELA1	protein_coding	down	0.851425	1	0.851425
AC090844.3	lincRNA	up	CELA1	protein_coding	down	0.851368	1	0.851368
AL355607.1	lincRNA	down	CFL2	protein_coding	down	0.868991	1	0.868991
AC010776.2	lincRNA	down	CFL2	protein_coding	down	0.867096	1	0.867096
AL513217.1	lincRNA	down	CFL2	protein_coding	down	0.856366	1	0.856366
AL356489.2	lincRNA	down	CHRM2	protein_coding	down	0.882816	1	0.882816
AC008938.1	lincRNA	up	CLRN1	protein_coding	up	0.917478	1	0.917478
AC135012.1	lincRNA	up	CLRN1	protein_coding	up	0.856574	1	0.856574
AC012409.3	lincRNA	down	CLRN1	protein_coding	up	0.854302	1	0.854302
CLRN1	protein_coding	up	CLSTN2-AS1	lincRNA	up	0.852226	1	0.852226
AC079313.2	lincRNA	down	CNN1	protein_coding	down	0.89347	1	0.89347
AL355607.1	lincRNA	down	CNN1	protein_coding	down	0.875033	1	0.875033
AF001548.1	lincRNA	down	CNN1	protein_coding	down	0.866871	1	0.866871
AC002398.2	lincRNA	down	CNN1	protein_coding	down	0.86301	1	0.86301
ATAD5	protein_coding	up	CNOT10-AS1	lincRNA	up	0.86058	1	0.86058
AL356489.2	lincRNA	down	CPEB1	protein_coding	down	0.878023	1	0.878023
AC079313.2	lincRNA	down	CPEB1	protein_coding	down	0.857696	1	0.857696
AC036108.3	lincRNA	down	CPEB1	protein_coding	down	0.852157	1	0.852157
AC002398.2	lincRNA	down	CPXM2	protein_coding	down	0.867074	1	0.867074
AC022893.2	lincRNA	down	CUX2	protein_coding	down	0.870411	1	0.870411
AC002398.2	lincRNA	down	DACT3	protein_coding	down	0.888539	1	0.888539
AL513217.1	lincRNA	down	DACT3	protein_coding	down	0.87814	1	0.87814
AL355607.1	lincRNA	down	DACT3	protein_coding	down	0.854736	1	0.854736
AL356489.2	lincRNA	down	DACT3	protein_coding	down	0.851635	1	0.851635
CELA1	protein_coding	down	DBET	lincRNA	up	0.903264	1	0.903264
AL008638.6	lincRNA	up	DCAF12L1	protein_coding	down	0.958856	1	0.958856
AC016705.1	lincRNA	up	DCAF12L1	protein_coding	down	0.958414	1	0.958414
AC073934.1	lincRNA	up	DCAF12L1	protein_coding	down	0.955914	1	0.955914
AC139099.2	lincRNA	down	DCAF12L1	protein_coding	down	0.955253	1	0.955253
AP004147.1	lincRNA	up	DCAF12L1	protein_coding	down	0.945638	1	0.945638
AC004835.1	lincRNA	up	DCAF12L1	protein_coding	down	0.944175	1	0.944175
AC018682.2	lincRNA	up	DCAF12L1	protein_coding	down	0.941185	1	0.941185
AC026688.2	lincRNA	down	DCAF12L1	protein_coding	down	0.939386	1	0.939386
AL355390.1	lincRNA	up	DCAF12L1	protein_coding	down	0.933437	1	0.933437
AL117328.2	lincRNA	up	DCAF12L1	protein_coding	down	0.929007	1	0.929007
AP002784.1	lincRNA	up	DCAF12L1	protein_coding	down	0.921592	1	0.921592
AC145207.7	lincRNA	up	DCAF12L1	protein_coding	down	0.918516	1	0.918516
AL772337.2	lincRNA	down	DCAF12L1	protein_coding	down	0.915993	1	0.915993
AC126614.1	lincRNA	up	DCAF12L1	protein_coding	down	0.914721	1	0.914721
AQP4-AS1	lincRNA	down	DCAF12L1	protein_coding	down	0.914111	1	0.914111
AC023906.2	lincRNA	down	DCAF12L1	protein_coding	down	0.913824	1	0.913824
AC084346.1	lincRNA	up	DCAF12L1	protein_coding	down	0.90998	1	0.90998
DBET	lincRNA	up	DCAF12L1	protein_coding	down	0.907743	1	0.907743
AC026469.1	lincRNA	down	DCAF12L1	protein_coding	down	0.906263	1	0.906263
AC122719.2	lincRNA	up	DCAF12L1	protein_coding	down	0.905432	1	0.905432
AC109479.3	lincRNA	up	DCAF12L1	protein_coding	down	0.905404	1	0.905404
AL157400.1	lincRNA	up	DCAF12L1	protein_coding	down	0.895271	1	0.895271
AC084064.1	lincRNA	down	DCAF12L1	protein_coding	down	0.894995	1	0.894995
AC068858.1	lincRNA	up	DCAF12L1	protein_coding	down	0.894267	1	0.894267
AP000265.1	lincRNA	up	DCAF12L1	protein_coding	down	0.893504	1	0.893504
C12orf80	lincRNA	up	DCAF12L1	protein_coding	down	0.890055	1	0.890055
AC090844.3	lincRNA	up	DCAF12L1	protein_coding	down	0.888859	1	0.888859
AL138767.1	lincRNA	up	DCAF12L1	protein_coding	down	0.887362	1	0.887362
AC012508.1	lincRNA	up	DCAF12L1	protein_coding	down	0.885678	1	0.885678
AC093642.1	lincRNA	down	DCAF12L1	protein_coding	down	0.885251	1	0.885251
AC087855.2	lincRNA	down	DCAF12L1	protein_coding	down	0.885168	1	0.885168
AL512604.3	lincRNA	up	DCAF12L1	protein_coding	down	0.88454	1	0.88454
AL096828.1	lincRNA	up	DCAF12L1	protein_coding	down	0.882742	1	0.882742
AC037441.1	lincRNA	up	DCAF12L1	protein_coding	down	0.880648	1	0.880648
AC245884.1	lincRNA	up	DCAF12L1	protein_coding	down	0.878952	1	0.878952
AC093496.1	lincRNA	up	DCAF12L1	protein_coding	down	0.876518	1	0.876518
AC015909.1	lincRNA	up	DCAF12L1	protein_coding	down	0.876101	1	0.876101
AC245052.1	lincRNA	up	DCAF12L1	protein_coding	down	0.875783	1	0.875783
AP002409.1	lincRNA	down	DCAF12L1	protein_coding	down	0.873039	1	0.873039
AC099684.1	lincRNA	up	DCAF12L1	protein_coding	down	0.8705	1	0.8705
AC026369.1	lincRNA	up	DCAF12L1	protein_coding	down	0.869767	1	0.869767
AP003064.2	lincRNA	down	DCAF12L1	protein_coding	down	0.868878	1	0.868878
AC243965.1	lincRNA	up	DCAF12L1	protein_coding	down	0.866089	1	0.866089
AL162431.1	lincRNA	up	DCAF12L1	protein_coding	down	0.865977	1	0.865977
AC093390.1	lincRNA	down	DCAF12L1	protein_coding	down	0.859483	1	0.859483
AC010907.2	lincRNA	up	DCAF12L1	protein_coding	down	0.857382	1	0.857382
AL354919.1	lincRNA	up	DCAF12L1	protein_coding	down	0.856965	1	0.856965
AL356414.1	lincRNA	up	DCAF12L1	protein_coding	down	0.854719	1	0.854719
AC022893.2	lincRNA	down	DCX	protein_coding	down	0.853829	1	0.853829
CELA1	protein_coding	down	DDR1-DT	lincRNA	up	0.907337	1	0.907337
DCAF12L1	protein_coding	down	DDR1-DT	lincRNA	up	0.879229	1	0.879229
AL513217.1	lincRNA	down	DES	protein_coding	down	0.902975	1	0.902975
AC002398.2	lincRNA	down	DES	protein_coding	down	0.897751	1	0.897751
AL355607.1	lincRNA	down	DES	protein_coding	down	0.888269	1	0.888269
AF001548.1	lincRNA	down	DES	protein_coding	down	0.867695	1	0.867695
AC079313.2	lincRNA	down	DES	protein_coding	down	0.86445	1	0.86445
AC036108.3	lincRNA	down	DIXDC1	protein_coding	down	0.865465	1	0.865465
AC036108.3	lincRNA	down	DMD	protein_coding	down	0.870338	1	0.870338
AC011352.1	lincRNA	up	DMP1	protein_coding	up	0.928349	1	0.928349
AC022778.1	lincRNA	up	DMP1	protein_coding	up	0.922179	1	0.922179
AC107953.2	lincRNA	up	DMP1	protein_coding	up	0.911312	1	0.911312
AC011352.3	lincRNA	up	DMP1	protein_coding	up	0.898484	1	0.898484
AL359693.1	lincRNA	up	DMP1	protein_coding	up	0.892677	1	0.892677
AC084871.2	lincRNA	up	DMP1	protein_coding	up	0.880831	1	0.880831
AP000487.2	lincRNA	up	DMP1	protein_coding	up	0.878936	1	0.878936
AC099550.1	lincRNA	up	DMP1	protein_coding	up	0.874774	1	0.874774
AC072022.1	lincRNA	up	DMP1	protein_coding	up	0.872351	1	0.872351
AC026782.2	lincRNA	up	DMP1	protein_coding	up	0.872245	1	0.872245
AL078604.2	lincRNA	up	DMP1	protein_coding	up	0.866686	1	0.866686
AL110292.1	lincRNA	down	DMP1	protein_coding	up	0.865839	1	0.865839
AC112178.1	lincRNA	up	DMP1	protein_coding	up	0.864354	1	0.864354
AC022973.4	lincRNA	up	DMP1	protein_coding	up	0.859397	1	0.859397
AP002518.1	lincRNA	up	DMP1	protein_coding	up	0.858035	1	0.858035
AC020611.2	lincRNA	up	DMP1	protein_coding	up	0.856886	1	0.856886
AC074286.1	lincRNA	up	DMP1	protein_coding	up	0.85536	1	0.85536
AC044781.1	lincRNA	up	DMP1	protein_coding	up	0.853541	1	0.853541
AC002398.2	lincRNA	down	DNAJB5	protein_coding	down	0.893871	1	0.893871
AL513217.1	lincRNA	down	DNAJB5	protein_coding	down	0.872295	1	0.872295
AF001548.1	lincRNA	down	DNAJB5	protein_coding	down	0.856158	1	0.856158
AC079313.2	lincRNA	down	DNAJB5	protein_coding	down	0.854502	1	0.854502
AC009102.2	lincRNA	down	EML1	protein_coding	down	0.875235	1	0.875235
AL513217.1	lincRNA	down	EML1	protein_coding	down	0.858846	1	0.858846
AC087379.1	lincRNA	down	ENTPD5	protein_coding	down	0.850994	1	0.850994
AC110491.1	lincRNA	down	EPHA6	protein_coding	down	0.885446	1	0.885446
AC009102.2	lincRNA	down	FAM129A	protein_coding	down	0.900706	1	0.900706
AC036108.3	lincRNA	down	FAM129A	protein_coding	down	0.854501	1	0.854501
ADAMTSL3	protein_coding	down	FENDRR	lincRNA	down	0.858624	1	0.858624
AC092376.2	lincRNA	down	FIGN	protein_coding	down	0.907147	1	0.907147
ADAMTS9-AS2	lincRNA	down	FIGN	protein_coding	down	0.899367	1	0.899367
FENDRR	lincRNA	down	FOXF1	protein_coding	down	0.888171	1	0.888171
FENDRR	lincRNA	down	FOXF2	protein_coding	down	0.885344	1	0.885344
CELA1	protein_coding	down	FP325330.3	lincRNA	up	0.851327	1	0.851327
AF001548.1	lincRNA	down	FRMPD4	protein_coding	down	0.90268	1	0.90268
AL356489.2	lincRNA	down	FRMPD4	protein_coding	down	0.892177	1	0.892177
AC009102.2	lincRNA	down	FRMPD4	protein_coding	down	0.873193	1	0.873193
AC069133.1	lincRNA	down	FRMPD4	protein_coding	down	0.864146	1	0.864146
BOLL	protein_coding	up	FTX	lincRNA	up	0.861968	1	0.861968
AP002784.1	lincRNA	up	GAL3ST3	protein_coding	down	0.926685	1	0.926685
AC073934.1	lincRNA	up	GAL3ST3	protein_coding	down	0.925683	1	0.925683
AC016705.1	lincRNA	up	GAL3ST3	protein_coding	down	0.915406	1	0.915406
AC139099.2	lincRNA	down	GAL3ST3	protein_coding	down	0.914953	1	0.914953
AC145207.7	lincRNA	up	GAL3ST3	protein_coding	down	0.909987	1	0.909987
AC018682.2	lincRNA	up	GAL3ST3	protein_coding	down	0.899498	1	0.899498
AC004835.1	lincRNA	up	GAL3ST3	protein_coding	down	0.899488	1	0.899488
DBET	lincRNA	up	GAL3ST3	protein_coding	down	0.895396	1	0.895396
AC126614.1	lincRNA	up	GAL3ST3	protein_coding	down	0.894755	1	0.894755
AL355390.1	lincRNA	up	GAL3ST3	protein_coding	down	0.892479	1	0.892479
AC026688.2	lincRNA	down	GAL3ST3	protein_coding	down	0.888435	1	0.888435
AL096828.1	lincRNA	up	GAL3ST3	protein_coding	down	0.883357	1	0.883357
AC109479.3	lincRNA	up	GAL3ST3	protein_coding	down	0.880009	1	0.880009
AC084346.1	lincRNA	up	GAL3ST3	protein_coding	down	0.879775	1	0.879775
AL008638.6	lincRNA	up	GAL3ST3	protein_coding	down	0.878078	1	0.878078
AC023906.2	lincRNA	down	GAL3ST3	protein_coding	down	0.87806	1	0.87806
AL117328.2	lincRNA	up	GAL3ST3	protein_coding	down	0.876615	1	0.876615
AL512604.3	lincRNA	up	GAL3ST3	protein_coding	down	0.864465	1	0.864465
AC245884.1	lincRNA	up	GAL3ST3	protein_coding	down	0.863046	1	0.863046
AC068858.1	lincRNA	up	GAL3ST3	protein_coding	down	0.862275	1	0.862275
AP003064.2	lincRNA	down	GAL3ST3	protein_coding	down	0.858411	1	0.858411
AC087855.2	lincRNA	down	GAL3ST3	protein_coding	down	0.858178	1	0.858178
AL772337.2	lincRNA	down	GAL3ST3	protein_coding	down	0.857422	1	0.857422
AP004147.1	lincRNA	up	GAL3ST3	protein_coding	down	0.857269	1	0.857269
AC093642.1	lincRNA	down	GAL3ST3	protein_coding	down	0.856239	1	0.856239
AC026469.1	lincRNA	down	GAL3ST3	protein_coding	down	0.851702	1	0.851702
AC026369.1	lincRNA	up	GAL3ST3	protein_coding	down	0.850844	1	0.850844
AC012358.1	lincRNA	up	GCM2	protein_coding	up	0.953465	1	0.953465
AL392048.1	lincRNA	up	GCM2	protein_coding	up	0.950804	1	0.950804
AL138820.1	lincRNA	up	GCM2	protein_coding	up	0.932128	1	0.932128
AC138393.3	lincRNA	up	GCM2	protein_coding	up	0.926956	1	0.926956
AC005899.5	lincRNA	up	GCM2	protein_coding	up	0.924365	1	0.924365
AL138963.1	lincRNA	up	GCM2	protein_coding	up	0.921507	1	0.921507
DLEU2	lincRNA	up	GCM2	protein_coding	up	0.918211	1	0.918211
AC117383.1	lincRNA	up	GCM2	protein_coding	up	0.915949	1	0.915949
AC090518.1	lincRNA	up	GCM2	protein_coding	up	0.915695	1	0.915695
AL031770.1	lincRNA	up	GCM2	protein_coding	up	0.910485	1	0.910485
AC007285.2	lincRNA	up	GCM2	protein_coding	up	0.903563	1	0.903563
AP005131.3	lincRNA	up	GCM2	protein_coding	up	0.903352	1	0.903352
AL109930.1	lincRNA	up	GCM2	protein_coding	up	0.901576	1	0.901576
AC021231.1	lincRNA	up	GCM2	protein_coding	up	0.898221	1	0.898221
CFAP44-AS1	lincRNA	up	GCM2	protein_coding	up	0.897354	1	0.897354
AL354977.2	lincRNA	up	GCM2	protein_coding	up	0.8971	1	0.8971
AC005021.1	lincRNA	up	GCM2	protein_coding	up	0.895416	1	0.895416
AL162734.1	lincRNA	up	GCM2	protein_coding	up	0.894412	1	0.894412
AC091946.2	lincRNA	up	GCM2	protein_coding	up	0.893919	1	0.893919
CYYR1-AS1	lincRNA	up	GCM2	protein_coding	up	0.892846	1	0.892846
AC004593.1	lincRNA	up	GCM2	protein_coding	up	0.890238	1	0.890238
AL513548.3	lincRNA	up	GCM2	protein_coding	up	0.888953	1	0.888953
DOCK9-AS1	lincRNA	up	GCM2	protein_coding	up	0.888204	1	0.888204
ATP11A-AS1	lincRNA	up	GCM2	protein_coding	up	0.88801	1	0.88801
AC011287.2	lincRNA	up	GCM2	protein_coding	up	0.887843	1	0.887843
AL022097.1	lincRNA	up	GCM2	protein_coding	up	0.887474	1	0.887474
AC007370.2	lincRNA	up	GCM2	protein_coding	up	0.886671	1	0.886671
AL138916.2	lincRNA	up	GCM2	protein_coding	up	0.886209	1	0.886209
AL357568.1	lincRNA	up	GCM2	protein_coding	up	0.885571	1	0.885571
AC116096.1	lincRNA	up	GCM2	protein_coding	up	0.882615	1	0.882615
AC008277.1	lincRNA	up	GCM2	protein_coding	up	0.880765	1	0.880765
AL357153.2	lincRNA	up	GCM2	protein_coding	up	0.880434	1	0.880434
AL080317.2	lincRNA	up	GCM2	protein_coding	up	0.878821	1	0.878821
AC110792.2	lincRNA	up	GCM2	protein_coding	up	0.877387	1	0.877387
AC016746.1	lincRNA	up	GCM2	protein_coding	up	0.877312	1	0.877312
AL442128.2	lincRNA	up	GCM2	protein_coding	up	0.876895	1	0.876895
AC105760.1	lincRNA	up	GCM2	protein_coding	up	0.875929	1	0.875929
AC005899.7	lincRNA	up	GCM2	protein_coding	up	0.875643	1	0.875643
AL391839.1	lincRNA	up	GCM2	protein_coding	up	0.875163	1	0.875163
AC011092.2	lincRNA	up	GCM2	protein_coding	up	0.873995	1	0.873995
AL807761.4	lincRNA	up	GCM2	protein_coding	up	0.872772	1	0.872772
AC007038.1	lincRNA	up	GCM2	protein_coding	up	0.871603	1	0.871603
AC008700.1	lincRNA	up	GCM2	protein_coding	up	0.870184	1	0.870184
AC055764.1	lincRNA	up	GCM2	protein_coding	up	0.870135	1	0.870135
AC010834.3	lincRNA	up	GCM2	protein_coding	up	0.868736	1	0.868736
AP005131.1	lincRNA	up	GCM2	protein_coding	up	0.868551	1	0.868551
AL049646.1	lincRNA	up	GCM2	protein_coding	up	0.868433	1	0.868433
AC092794.2	lincRNA	up	GCM2	protein_coding	up	0.867768	1	0.867768
BX248123.1	lincRNA	up	GCM2	protein_coding	up	0.867075	1	0.867075
AC108463.3	lincRNA	up	GCM2	protein_coding	up	0.866606	1	0.866606
AC008507.2	lincRNA	up	GCM2	protein_coding	up	0.866269	1	0.866269
ETS1-AS1	lincRNA	up	GCM2	protein_coding	up	0.86576	1	0.86576
AL139120.1	lincRNA	up	GCM2	protein_coding	up	0.865178	1	0.865178
AL360091.3	lincRNA	up	GCM2	protein_coding	up	0.86506	1	0.86506
AL445465.1	lincRNA	up	GCM2	protein_coding	up	0.864128	1	0.864128
AL049830.3	lincRNA	up	GCM2	protein_coding	up	0.863883	1	0.863883
AP001178.2	lincRNA	up	GCM2	protein_coding	up	0.863396	1	0.863396
AC087501.1	lincRNA	up	GCM2	protein_coding	up	0.862755	1	0.862755
AC005899.8	lincRNA	up	GCM2	protein_coding	up	0.862534	1	0.862534
AC019080.3	lincRNA	up	GCM2	protein_coding	up	0.861789	1	0.861789
AL355613.1	lincRNA	up	GCM2	protein_coding	up	0.860289	1	0.860289
AL021328.1	lincRNA	up	GCM2	protein_coding	up	0.860008	1	0.860008
AC024475.1	lincRNA	up	GCM2	protein_coding	up	0.85917	1	0.85917
AC093788.1	lincRNA	up	GCM2	protein_coding	up	0.85915	1	0.85915
FSIP2-AS1	lincRNA	up	GCM2	protein_coding	up	0.858035	1	0.858035
AC010401.1	lincRNA	up	GCM2	protein_coding	up	0.857437	1	0.857437
AC104806.2	lincRNA	up	GCM2	protein_coding	up	0.857039	1	0.857039
AC023632.5	lincRNA	up	GCM2	protein_coding	up	0.856585	1	0.856585
AC022973.2	lincRNA	up	GCM2	protein_coding	up	0.855903	1	0.855903
BIRC6-AS1	lincRNA	up	GCM2	protein_coding	up	0.854654	1	0.854654
AL109935.1	lincRNA	up	GCM2	protein_coding	up	0.854597	1	0.854597
AC132219.1	lincRNA	up	GCM2	protein_coding	up	0.854325	1	0.854325
AL139095.4	lincRNA	up	GCM2	protein_coding	up	0.854278	1	0.854278
AC092338.3	lincRNA	up	GCM2	protein_coding	up	0.852532	1	0.852532
DMP1	protein_coding	up	GK-AS1	lincRNA	up	0.863693	1	0.863693
AC103739.2	lincRNA	up	GLRA1	protein_coding	up	0.924321	1	0.924321
AC025030.2	lincRNA	up	GLRA1	protein_coding	up	0.919289	1	0.919289
AC022893.3	lincRNA	up	GLRA1	protein_coding	up	0.916931	1	0.916931
AC018442.2	lincRNA	up	GLRA1	protein_coding	up	0.915831	1	0.915831
AC022395.1	lincRNA	up	GLRA1	protein_coding	up	0.914406	1	0.914406
AC010401.1	lincRNA	up	GLRA1	protein_coding	up	0.913565	1	0.913565
AC096708.2	lincRNA	up	GLRA1	protein_coding	up	0.911782	1	0.911782
AC022973.2	lincRNA	up	GLRA1	protein_coding	up	0.91119	1	0.91119
AC009542.1	lincRNA	up	GLRA1	protein_coding	up	0.910806	1	0.910806
AC007336.1	lincRNA	up	GLRA1	protein_coding	up	0.909165	1	0.909165
AC100821.2	lincRNA	up	GLRA1	protein_coding	up	0.908837	1	0.908837
AP000487.2	lincRNA	up	GLRA1	protein_coding	up	0.908244	1	0.908244
AC117834.1	lincRNA	up	GLRA1	protein_coding	up	0.906475	1	0.906475
AP003086.3	lincRNA	up	GLRA1	protein_coding	up	0.90391	1	0.90391
AC090337.1	lincRNA	up	GLRA1	protein_coding	up	0.902014	1	0.902014
AC002064.1	lincRNA	up	GLRA1	protein_coding	up	0.901281	1	0.901281
AP001178.2	lincRNA	up	GLRA1	protein_coding	up	0.900798	1	0.900798
AL645504.1	lincRNA	up	GLRA1	protein_coding	up	0.899219	1	0.899219
AL161757.2	lincRNA	up	GLRA1	protein_coding	up	0.896406	1	0.896406
AP002884.4	lincRNA	up	GLRA1	protein_coding	up	0.896389	1	0.896389
CFAP44-AS1	lincRNA	up	GLRA1	protein_coding	up	0.896039	1	0.896039
AC016910.1	lincRNA	up	GLRA1	protein_coding	up	0.895723	1	0.895723
AC011092.2	lincRNA	up	GLRA1	protein_coding	up	0.89469	1	0.89469
AL354733.2	lincRNA	up	GLRA1	protein_coding	up	0.893682	1	0.893682
EGOT	lincRNA	up	GLRA1	protein_coding	up	0.89368	1	0.89368
AC100800.1	lincRNA	up	GLRA1	protein_coding	up	0.893614	1	0.893614
AL445248.1	lincRNA	up	GLRA1	protein_coding	up	0.892847	1	0.892847
AC022540.1	lincRNA	up	GLRA1	protein_coding	up	0.892266	1	0.892266
AC018462.1	lincRNA	up	GLRA1	protein_coding	up	0.890973	1	0.890973
AC068389.3	lincRNA	up	GLRA1	protein_coding	up	0.890343	1	0.890343
AL451070.1	lincRNA	up	GLRA1	protein_coding	up	0.889915	1	0.889915
AF178030.1	lincRNA	up	GLRA1	protein_coding	up	0.889682	1	0.889682
AC090739.1	lincRNA	up	GLRA1	protein_coding	up	0.888406	1	0.888406
AL031770.1	lincRNA	up	GLRA1	protein_coding	up	0.887302	1	0.887302
COL5A1-AS1	lincRNA	up	GLRA1	protein_coding	up	0.887232	1	0.887232
AC234772.2	lincRNA	up	GLRA1	protein_coding	up	0.886138	1	0.886138
AC130651.1	lincRNA	up	GLRA1	protein_coding	up	0.885546	1	0.885546
AC020611.2	lincRNA	up	GLRA1	protein_coding	up	0.884806	1	0.884806
AC023632.5	lincRNA	up	GLRA1	protein_coding	up	0.884584	1	0.884584
AP002518.1	lincRNA	up	GLRA1	protein_coding	up	0.884008	1	0.884008
AC136424.2	lincRNA	up	GLRA1	protein_coding	up	0.883883	1	0.883883
ARNTL2-AS1	lincRNA	up	GLRA1	protein_coding	up	0.883741	1	0.883741
AL357568.1	lincRNA	up	GLRA1	protein_coding	up	0.883559	1	0.883559
AC113143.1	lincRNA	up	GLRA1	protein_coding	up	0.883265	1	0.883265
AC010285.1	lincRNA	up	GLRA1	protein_coding	up	0.883089	1	0.883089
AC009948.2	lincRNA	up	GLRA1	protein_coding	up	0.882673	1	0.882673
AC021739.4	lincRNA	up	GLRA1	protein_coding	up	0.882417	1	0.882417
AL080317.2	lincRNA	up	GLRA1	protein_coding	up	0.881227	1	0.881227
AC016866.2	lincRNA	up	GLRA1	protein_coding	up	0.881219	1	0.881219
AC006460.1	lincRNA	up	GLRA1	protein_coding	up	0.879814	1	0.879814
AC073569.1	lincRNA	up	GLRA1	protein_coding	up	0.879209	1	0.879209
AC110792.2	lincRNA	up	GLRA1	protein_coding	up	0.879029	1	0.879029
AC019080.4	lincRNA	up	GLRA1	protein_coding	up	0.877864	1	0.877864
AC009299.3	lincRNA	up	GLRA1	protein_coding	up	0.87734	1	0.87734
AC092794.2	lincRNA	up	GLRA1	protein_coding	up	0.876402	1	0.876402
AP003467.1	lincRNA	up	GLRA1	protein_coding	up	0.876249	1	0.876249
AC012213.3	lincRNA	up	GLRA1	protein_coding	up	0.874914	1	0.874914
AL023584.2	lincRNA	up	GLRA1	protein_coding	up	0.873993	1	0.873993
AC130650.1	lincRNA	up	GLRA1	protein_coding	up	0.873771	1	0.873771
AC021744.1	lincRNA	up	GLRA1	protein_coding	up	0.873618	1	0.873618
AC083806.2	lincRNA	up	GLRA1	protein_coding	up	0.872494	1	0.872494
AL157938.3	lincRNA	up	GLRA1	protein_coding	up	0.8722	1	0.8722
ENOX1-AS1	lincRNA	up	GLRA1	protein_coding	up	0.871561	1	0.871561
AL353771.1	lincRNA	up	GLRA1	protein_coding	up	0.869848	1	0.869848
AL359094.1	lincRNA	up	GLRA1	protein_coding	up	0.869696	1	0.869696
CARNMT1-AS1	lincRNA	up	GLRA1	protein_coding	up	0.869226	1	0.869226
AP001527.1	lincRNA	up	GLRA1	protein_coding	up	0.869212	1	0.869212
AC025576.2	lincRNA	up	GLRA1	protein_coding	up	0.868397	1	0.868397
AC044781.1	lincRNA	up	GLRA1	protein_coding	up	0.867857	1	0.867857
AC080162.1	lincRNA	up	GLRA1	protein_coding	up	0.867367	1	0.867367
AP001001.1	lincRNA	up	GLRA1	protein_coding	up	0.866138	1	0.866138
AP003696.1	lincRNA	up	GLRA1	protein_coding	up	0.86612	1	0.86612
AP002812.3	lincRNA	up	GLRA1	protein_coding	up	0.865599	1	0.865599
AL049637.1	lincRNA	up	GLRA1	protein_coding	up	0.86526	1	0.86526
AL391097.2	lincRNA	up	GLRA1	protein_coding	up	0.864217	1	0.864217
CLYBL-AS2	lincRNA	up	GLRA1	protein_coding	up	0.863484	1	0.863484
AC131182.1	lincRNA	up	GLRA1	protein_coding	up	0.863383	1	0.863383
AC002064.2	lincRNA	up	GLRA1	protein_coding	up	0.862494	1	0.862494
AL049820.1	lincRNA	up	GLRA1	protein_coding	up	0.86204	1	0.86204
AL499616.1	lincRNA	up	GLRA1	protein_coding	up	0.862001	1	0.862001
AL158166.2	lincRNA	up	GLRA1	protein_coding	up	0.861835	1	0.861835
DOCK9-AS1	lincRNA	up	GLRA1	protein_coding	up	0.861473	1	0.861473
AC093788.1	lincRNA	up	GLRA1	protein_coding	up	0.861458	1	0.861458
AL022097.1	lincRNA	up	GLRA1	protein_coding	up	0.861372	1	0.861372
AC008277.1	lincRNA	up	GLRA1	protein_coding	up	0.860939	1	0.860939
AL356805.1	lincRNA	up	GLRA1	protein_coding	up	0.860921	1	0.860921
AC019080.3	lincRNA	up	GLRA1	protein_coding	up	0.860168	1	0.860168
AL355613.1	lincRNA	up	GLRA1	protein_coding	up	0.859648	1	0.859648
ETS1-AS1	lincRNA	up	GLRA1	protein_coding	up	0.859648	1	0.859648
AC022973.3	lincRNA	up	GLRA1	protein_coding	up	0.859244	1	0.859244
AC027228.1	lincRNA	up	GLRA1	protein_coding	up	0.859132	1	0.859132
AC008474.1	lincRNA	up	GLRA1	protein_coding	up	0.858762	1	0.858762
AC013640.1	lincRNA	up	GLRA1	protein_coding	up	0.858733	1	0.858733
AL360091.3	lincRNA	up	GLRA1	protein_coding	up	0.85792	1	0.85792
AC107909.2	lincRNA	up	GLRA1	protein_coding	up	0.857399	1	0.857399
AC104982.1	lincRNA	up	GLRA1	protein_coding	up	0.857044	1	0.857044
AC116903.2	lincRNA	up	GLRA1	protein_coding	up	0.856719	1	0.856719
AL121957.1	lincRNA	up	GLRA1	protein_coding	up	0.856117	1	0.856117
AC009303.3	lincRNA	up	GLRA1	protein_coding	up	0.85534	1	0.85534
AC104316.1	lincRNA	up	GLRA1	protein_coding	up	0.855138	1	0.855138
AL139120.1	lincRNA	up	GLRA1	protein_coding	up	0.854963	1	0.854963
AC138393.3	lincRNA	up	GLRA1	protein_coding	up	0.854924	1	0.854924
AC109466.1	lincRNA	up	GLRA1	protein_coding	up	0.854762	1	0.854762
AL133260.2	lincRNA	up	GLRA1	protein_coding	up	0.854396	1	0.854396
AC095033.1	lincRNA	up	GLRA1	protein_coding	up	0.854102	1	0.854102
AC010834.3	lincRNA	up	GLRA1	protein_coding	up	0.854097	1	0.854097
AC025211.1	lincRNA	up	GLRA1	protein_coding	up	0.853371	1	0.853371
AC007731.3	lincRNA	up	GLRA1	protein_coding	up	0.853151	1	0.853151
AC073263.2	lincRNA	up	GLRA1	protein_coding	up	0.85284	1	0.85284
AL391097.1	lincRNA	up	GLRA1	protein_coding	up	0.852754	1	0.852754
AC007938.2	lincRNA	up	GLRA1	protein_coding	up	0.852581	1	0.852581
AC026401.1	lincRNA	up	GLRA1	protein_coding	up	0.85155	1	0.85155
AL023581.1	lincRNA	up	GLRA1	protein_coding	up	0.851315	1	0.851315
AL359922.2	lincRNA	up	GLRA1	protein_coding	up	0.850683	1	0.850683
AC009102.2	lincRNA	down	GNAO1	protein_coding	down	0.930777	1	0.930777
AC002398.2	lincRNA	down	GNAO1	protein_coding	down	0.903159	1	0.903159
AF001548.1	lincRNA	down	GNAO1	protein_coding	down	0.882856	1	0.882856
AL513217.1	lincRNA	down	GNAO1	protein_coding	down	0.879629	1	0.879629
AL356489.2	lincRNA	down	GNAO1	protein_coding	down	0.868947	1	0.868947
AC010776.2	lincRNA	down	GNAO1	protein_coding	down	0.86693	1	0.86693
FENDRR	lincRNA	down	GNAO1	protein_coding	down	0.858734	1	0.858734
AC011306.1	lincRNA	down	GPM6A	protein_coding	down	0.868086	1	0.868086
AC010776.2	lincRNA	down	GPM6A	protein_coding	down	0.86388	1	0.86388
AC009102.2	lincRNA	down	GPM6A	protein_coding	down	0.861881	1	0.861881
AL513217.1	lincRNA	down	GPM6A	protein_coding	down	0.859092	1	0.859092
AC110491.1	lincRNA	down	GPM6A	protein_coding	down	0.855456	1	0.855456
AC092720.2	lincRNA	down	GPR26	protein_coding	down	0.89324	1	0.89324
DCAF12L1	protein_coding	down	GPRACR	lincRNA	down	0.915834	1	0.915834
CELA1	protein_coding	down	GPRACR	lincRNA	down	0.874475	1	0.874475
GAL3ST3	protein_coding	down	GPRACR	lincRNA	down	0.866169	1	0.866169
AC008938.1	lincRNA	up	GRIA2	protein_coding	down	0.894465	1	0.894465
AC106895.2	lincRNA	down	GRIA2	protein_coding	down	0.894129	1	0.894129
CLSTN2-AS1	lincRNA	up	GRIA2	protein_coding	down	0.854082	1	0.854082
AC012358.1	lincRNA	up	GRIK1	protein_coding	down	0.950905	1	0.950905
AC110792.2	lincRNA	up	GRIK1	protein_coding	down	0.931235	1	0.931235
AL031770.1	lincRNA	up	GRIK1	protein_coding	down	0.929943	1	0.929943
AC108463.3	lincRNA	up	GRIK1	protein_coding	down	0.927383	1	0.927383
AL138963.1	lincRNA	up	GRIK1	protein_coding	down	0.923887	1	0.923887
AL392048.1	lincRNA	up	GRIK1	protein_coding	down	0.923732	1	0.923732
CYYR1-AS1	lincRNA	up	GRIK1	protein_coding	down	0.921417	1	0.921417
AP001381.1	lincRNA	up	GRIK1	protein_coding	down	0.92096	1	0.92096
AC024475.1	lincRNA	up	GRIK1	protein_coding	down	0.920181	1	0.920181
AC138393.3	lincRNA	up	GRIK1	protein_coding	down	0.919158	1	0.919158
AC022973.2	lincRNA	up	GRIK1	protein_coding	down	0.91895	1	0.91895
AC008277.1	lincRNA	up	GRIK1	protein_coding	down	0.917358	1	0.917358
AL357568.1	lincRNA	up	GRIK1	protein_coding	down	0.916999	1	0.916999
AL391839.1	lincRNA	up	GRIK1	protein_coding	down	0.916111	1	0.916111
AL360091.3	lincRNA	up	GRIK1	protein_coding	down	0.915387	1	0.915387
AC090518.1	lincRNA	up	GRIK1	protein_coding	down	0.915292	1	0.915292
AC087501.1	lincRNA	up	GRIK1	protein_coding	down	0.915139	1	0.915139
AL645504.1	lincRNA	up	GRIK1	protein_coding	down	0.914246	1	0.914246
AC116158.1	lincRNA	up	GRIK1	protein_coding	down	0.91182	1	0.91182
AC103739.2	lincRNA	up	GRIK1	protein_coding	down	0.911465	1	0.911465
AC055764.1	lincRNA	up	GRIK1	protein_coding	down	0.910555	1	0.910555
AL049820.1	lincRNA	up	GRIK1	protein_coding	down	0.908522	1	0.908522
ETS1-AS1	lincRNA	up	GRIK1	protein_coding	down	0.906906	1	0.906906
AC010401.1	lincRNA	up	GRIK1	protein_coding	down	0.906735	1	0.906735
ENOX1-AS1	lincRNA	up	GRIK1	protein_coding	down	0.904283	1	0.904283
AC092839.2	lincRNA	up	GRIK1	protein_coding	down	0.903961	1	0.903961
AC018442.2	lincRNA	up	GRIK1	protein_coding	down	0.90385	1	0.90385
AP001178.2	lincRNA	up	GRIK1	protein_coding	down	0.903575	1	0.903575
CFAP44-AS1	lincRNA	up	GRIK1	protein_coding	down	0.90348	1	0.90348
AP005131.1	lincRNA	up	GRIK1	protein_coding	down	0.903307	1	0.903307
AC044781.1	lincRNA	up	GRIK1	protein_coding	down	0.901322	1	0.901322
AC022395.1	lincRNA	up	GRIK1	protein_coding	down	0.90131	1	0.90131
AC080162.1	lincRNA	up	GRIK1	protein_coding	down	0.899303	1	0.899303
AL022097.1	lincRNA	up	GRIK1	protein_coding	down	0.899189	1	0.899189
AC018462.1	lincRNA	up	GRIK1	protein_coding	down	0.898454	1	0.898454
AP003086.3	lincRNA	up	GRIK1	protein_coding	down	0.897601	1	0.897601
AP002518.1	lincRNA	up	GRIK1	protein_coding	down	0.896418	1	0.896418
AF127577.2	lincRNA	up	GRIK1	protein_coding	down	0.896356	1	0.896356
DOCK9-AS1	lincRNA	up	GRIK1	protein_coding	down	0.895192	1	0.895192
AL391097.1	lincRNA	up	GRIK1	protein_coding	down	0.894911	1	0.894911
BIRC6-AS1	lincRNA	up	GRIK1	protein_coding	down	0.894287	1	0.894287
AC092794.2	lincRNA	up	GRIK1	protein_coding	down	0.894234	1	0.894234
AL353771.1	lincRNA	up	GRIK1	protein_coding	down	0.89378	1	0.89378
AC005899.8	lincRNA	up	GRIK1	protein_coding	down	0.89311	1	0.89311
AC019080.3	lincRNA	up	GRIK1	protein_coding	down	0.892115	1	0.892115
AL139120.1	lincRNA	up	GRIK1	protein_coding	down	0.891874	1	0.891874
AC011405.1	lincRNA	up	GRIK1	protein_coding	down	0.891319	1	0.891319
AC012213.3	lincRNA	up	GRIK1	protein_coding	down	0.89104	1	0.89104
AC083806.2	lincRNA	up	GRIK1	protein_coding	down	0.890889	1	0.890889
ATP11A-AS1	lincRNA	up	GRIK1	protein_coding	down	0.890302	1	0.890302
AC104316.1	lincRNA	up	GRIK1	protein_coding	down	0.89025	1	0.89025
AL354733.2	lincRNA	up	GRIK1	protein_coding	down	0.889921	1	0.889921
AL139095.4	lincRNA	up	GRIK1	protein_coding	down	0.889727	1	0.889727
AC106873.1	lincRNA	up	GRIK1	protein_coding	down	0.888627	1	0.888627
AC007285.2	lincRNA	up	GRIK1	protein_coding	down	0.887476	1	0.887476
AL138820.1	lincRNA	up	GRIK1	protein_coding	down	0.886829	1	0.886829
CACNA1C-AS4	lincRNA	up	GRIK1	protein_coding	down	0.886102	1	0.886102
AC010976.1	lincRNA	up	GRIK1	protein_coding	down	0.886033	1	0.886033
AL445248.1	lincRNA	up	GRIK1	protein_coding	down	0.885986	1	0.885986
AC073569.1	lincRNA	up	GRIK1	protein_coding	down	0.88595	1	0.88595
AC007731.3	lincRNA	up	GRIK1	protein_coding	down	0.885663	1	0.885663
AC005344.1	lincRNA	up	GRIK1	protein_coding	down	0.885051	1	0.885051
AL513188.1	lincRNA	up	GRIK1	protein_coding	down	0.884894	1	0.884894
AL359094.1	lincRNA	up	GRIK1	protein_coding	down	0.884492	1	0.884492
AC019080.4	lincRNA	up	GRIK1	protein_coding	down	0.884138	1	0.884138
AC130650.1	lincRNA	up	GRIK1	protein_coding	down	0.883407	1	0.883407
AC091946.2	lincRNA	up	GRIK1	protein_coding	down	0.882712	1	0.882712
AC011092.2	lincRNA	up	GRIK1	protein_coding	down	0.882298	1	0.882298
BACH1-IT2	lincRNA	up	GRIK1	protein_coding	down	0.882261	1	0.882261
AL355613.1	lincRNA	up	GRIK1	protein_coding	down	0.882174	1	0.882174
AC090337.1	lincRNA	up	GRIK1	protein_coding	down	0.881875	1	0.881875
AC025030.2	lincRNA	up	GRIK1	protein_coding	down	0.881602	1	0.881602
AC008507.2	lincRNA	up	GRIK1	protein_coding	down	0.880506	1	0.880506
AL080317.2	lincRNA	up	GRIK1	protein_coding	down	0.879866	1	0.879866
AP005131.3	lincRNA	up	GRIK1	protein_coding	down	0.879459	1	0.879459
AL023584.2	lincRNA	up	GRIK1	protein_coding	down	0.878955	1	0.878955
AL445465.1	lincRNA	up	GRIK1	protein_coding	down	0.878943	1	0.878943
AC009303.3	lincRNA	up	GRIK1	protein_coding	down	0.878651	1	0.878651
AC078795.1	lincRNA	up	GRIK1	protein_coding	down	0.878021	1	0.878021
AL138916.2	lincRNA	up	GRIK1	protein_coding	down	0.877856	1	0.877856
AL590723.1	lincRNA	up	GRIK1	protein_coding	down	0.877761	1	0.877761
AC044840.1	lincRNA	up	GRIK1	protein_coding	down	0.877011	1	0.877011
AIRN	lincRNA	up	GRIK1	protein_coding	down	0.876027	1	0.876027
AC055733.2	lincRNA	up	GRIK1	protein_coding	down	0.875941	1	0.875941
ARNTL2-AS1	lincRNA	up	GRIK1	protein_coding	down	0.875891	1	0.875891
AC090519.2	lincRNA	up	GRIK1	protein_coding	down	0.875765	1	0.875765
AC079035.1	lincRNA	up	GRIK1	protein_coding	down	0.875113	1	0.875113
AC134407.1	lincRNA	up	GRIK1	protein_coding	down	0.874864	1	0.874864
AC100763.1	lincRNA	up	GRIK1	protein_coding	down	0.874565	1	0.874565
AL049637.1	lincRNA	up	GRIK1	protein_coding	down	0.874217	1	0.874217
AC008534.1	lincRNA	up	GRIK1	protein_coding	down	0.874017	1	0.874017
AC005899.5	lincRNA	up	GRIK1	protein_coding	down	0.874013	1	0.874013
AC131182.1	lincRNA	up	GRIK1	protein_coding	down	0.873638	1	0.873638
AC016866.2	lincRNA	up	GRIK1	protein_coding	down	0.873592	1	0.873592
AC006460.1	lincRNA	up	GRIK1	protein_coding	down	0.873447	1	0.873447
AC037487.2	lincRNA	up	GRIK1	protein_coding	down	0.87332	1	0.87332
AC069542.1	lincRNA	up	GRIK1	protein_coding	down	0.872601	1	0.872601
AL157402.2	lincRNA	up	GRIK1	protein_coding	down	0.87216	1	0.87216
AC004672.1	lincRNA	up	GRIK1	protein_coding	down	0.872004	1	0.872004
AC009542.1	lincRNA	up	GRIK1	protein_coding	down	0.871228	1	0.871228
AC007038.1	lincRNA	up	GRIK1	protein_coding	down	0.869822	1	0.869822
AF178030.1	lincRNA	up	GRIK1	protein_coding	down	0.868312	1	0.868312
AC105760.1	lincRNA	up	GRIK1	protein_coding	down	0.867811	1	0.867811
AC136424.2	lincRNA	up	GRIK1	protein_coding	down	0.86757	1	0.86757
AL035658.1	lincRNA	up	GRIK1	protein_coding	down	0.867309	1	0.867309
COL4A2-AS2	lincRNA	up	GRIK1	protein_coding	down	0.866815	1	0.866815
AC096708.2	lincRNA	up	GRIK1	protein_coding	down	0.866569	1	0.866569
AC100800.1	lincRNA	up	GRIK1	protein_coding	down	0.865801	1	0.865801
AC093788.1	lincRNA	up	GRIK1	protein_coding	down	0.865509	1	0.865509
AC130650.2	lincRNA	up	GRIK1	protein_coding	down	0.865291	1	0.865291
AC234772.2	lincRNA	up	GRIK1	protein_coding	down	0.865277	1	0.865277
AL731577.1	lincRNA	up	GRIK1	protein_coding	down	0.865135	1	0.865135
AC026401.1	lincRNA	up	GRIK1	protein_coding	down	0.864996	1	0.864996
DENND6A-AS1	lincRNA	up	GRIK1	protein_coding	down	0.864598	1	0.864598
AC020900.1	lincRNA	up	GRIK1	protein_coding	down	0.864077	1	0.864077
AL365356.1	lincRNA	up	GRIK1	protein_coding	down	0.863471	1	0.863471
AC116096.1	lincRNA	up	GRIK1	protein_coding	down	0.863202	1	0.863202
AL391097.2	lincRNA	up	GRIK1	protein_coding	down	0.863163	1	0.863163
BX248123.1	lincRNA	up	GRIK1	protein_coding	down	0.863127	1	0.863127
FOXN3-AS2	lincRNA	up	GRIK1	protein_coding	down	0.862886	1	0.862886
CELF2-AS1	lincRNA	up	GRIK1	protein_coding	down	0.862699	1	0.862699
AC005757.1	lincRNA	up	GRIK1	protein_coding	down	0.861923	1	0.861923
AL499616.1	lincRNA	up	GRIK1	protein_coding	down	0.861685	1	0.861685
AC010978.1	lincRNA	up	GRIK1	protein_coding	down	0.861573	1	0.861573
AL021328.1	lincRNA	up	GRIK1	protein_coding	down	0.861344	1	0.861344
AC078962.3	lincRNA	up	GRIK1	protein_coding	down	0.861285	1	0.861285
AC022400.2	lincRNA	up	GRIK1	protein_coding	down	0.86114	1	0.86114
AC021739.4	lincRNA	up	GRIK1	protein_coding	down	0.860935	1	0.860935
AL590006.1	lincRNA	up	GRIK1	protein_coding	down	0.860854	1	0.860854
AC022001.2	lincRNA	up	GRIK1	protein_coding	down	0.860761	1	0.860761
AC024267.4	lincRNA	up	GRIK1	protein_coding	down	0.860096	1	0.860096
AC068389.3	lincRNA	up	GRIK1	protein_coding	down	0.860075	1	0.860075
AL049647.1	lincRNA	up	GRIK1	protein_coding	down	0.859622	1	0.859622
AC008781.2	lincRNA	up	GRIK1	protein_coding	down	0.859618	1	0.859618
AP002439.1	lincRNA	up	GRIK1	protein_coding	down	0.859113	1	0.859113
AC132219.1	lincRNA	up	GRIK1	protein_coding	down	0.85899	1	0.85899
AC021231.1	lincRNA	up	GRIK1	protein_coding	down	0.858858	1	0.858858
AC020661.2	lincRNA	up	GRIK1	protein_coding	down	0.858804	1	0.858804
AC026894.1	lincRNA	up	GRIK1	protein_coding	down	0.858335	1	0.858335
AC069029.1	lincRNA	up	GRIK1	protein_coding	down	0.858246	1	0.858246
AC018878.1	lincRNA	up	GRIK1	protein_coding	down	0.858066	1	0.858066
CLYBL-AS2	lincRNA	up	GRIK1	protein_coding	down	0.857962	1	0.857962
AC027228.1	lincRNA	up	GRIK1	protein_coding	down	0.857752	1	0.857752
AC013549.1	lincRNA	up	GRIK1	protein_coding	down	0.857667	1	0.857667
AC010834.3	lincRNA	up	GRIK1	protein_coding	down	0.857653	1	0.857653
COL5A1-AS1	lincRNA	up	GRIK1	protein_coding	down	0.857336	1	0.857336
AC022540.1	lincRNA	up	GRIK1	protein_coding	down	0.856992	1	0.856992
AC023632.5	lincRNA	up	GRIK1	protein_coding	down	0.856964	1	0.856964
AC007448.2	lincRNA	up	GRIK1	protein_coding	down	0.856681	1	0.856681
DLEU2	lincRNA	up	GRIK1	protein_coding	down	0.855268	1	0.855268
AL109930.1	lincRNA	up	GRIK1	protein_coding	down	0.855043	1	0.855043
AC087286.2	lincRNA	up	GRIK1	protein_coding	down	0.854686	1	0.854686
AL132989.2	lincRNA	up	GRIK1	protein_coding	down	0.854647	1	0.854647
AC016910.1	lincRNA	up	GRIK1	protein_coding	down	0.854621	1	0.854621
AL354977.2	lincRNA	up	GRIK1	protein_coding	down	0.854417	1	0.854417
AC011815.2	lincRNA	up	GRIK1	protein_coding	down	0.854319	1	0.854319
AC007728.1	lincRNA	up	GRIK1	protein_coding	down	0.854043	1	0.854043
AL357153.2	lincRNA	up	GRIK1	protein_coding	down	0.85395	1	0.85395
AC087286.1	lincRNA	up	GRIK1	protein_coding	down	0.853768	1	0.853768
AC010285.1	lincRNA	up	GRIK1	protein_coding	down	0.853502	1	0.853502
CASC15	lincRNA	up	GRIK1	protein_coding	down	0.853462	1	0.853462
AC064874.1	lincRNA	up	GRIK1	protein_coding	down	0.853421	1	0.853421
AC068025.2	lincRNA	up	GRIK1	protein_coding	down	0.852949	1	0.852949
AL023581.1	lincRNA	up	GRIK1	protein_coding	down	0.852946	1	0.852946
AC074033.1	lincRNA	up	GRIK1	protein_coding	down	0.85275	1	0.85275
AL807761.4	lincRNA	up	GRIK1	protein_coding	down	0.852345	1	0.852345
AL117190.1	lincRNA	up	GRIK1	protein_coding	down	0.852153	1	0.852153
DOCK4-AS1	lincRNA	up	GRIK1	protein_coding	down	0.851992	1	0.851992
AC118555.1	lincRNA	up	GRIK1	protein_coding	down	0.850239	1	0.850239
AC026470.3	lincRNA	up	GRIK1	protein_coding	down	0.850118	1	0.850118
AC009102.2	lincRNA	down	GRIK5	protein_coding	down	0.852973	1	0.852973
AC096708.2	lincRNA	up	GRM5	protein_coding	up	0.892368	1	0.892368
AP001527.1	lincRNA	up	GRM5	protein_coding	up	0.88462	1	0.88462
ENOX1-AS1	lincRNA	up	GRM5	protein_coding	up	0.880448	1	0.880448
AP002518.1	lincRNA	up	GRM5	protein_coding	up	0.874456	1	0.874456
AC106895.2	lincRNA	down	GRM5	protein_coding	up	0.871477	1	0.871477
AL645504.1	lincRNA	up	GRM5	protein_coding	up	0.868256	1	0.868256
AC008534.1	lincRNA	up	GRM5	protein_coding	up	0.863347	1	0.863347
AP000487.2	lincRNA	up	GRM5	protein_coding	up	0.858331	1	0.858331
AC090337.1	lincRNA	up	GRM5	protein_coding	up	0.853694	1	0.853694
AC026688.2	lincRNA	down	GSG1L	protein_coding	down	0.885702	1	0.885702
AL772337.2	lincRNA	down	GSG1L	protein_coding	down	0.87945	1	0.87945
AC139099.2	lincRNA	down	GSG1L	protein_coding	down	0.877397	1	0.877397
AL008638.6	lincRNA	up	GSG1L	protein_coding	down	0.874289	1	0.874289
AC016705.1	lincRNA	up	GSG1L	protein_coding	down	0.868686	1	0.868686
AP004147.1	lincRNA	up	GSG1L	protein_coding	down	0.866096	1	0.866096
AC073934.1	lincRNA	up	GSG1L	protein_coding	down	0.860889	1	0.860889
GPRACR	lincRNA	down	GSG1L	protein_coding	down	0.85869	1	0.85869
AC026469.1	lincRNA	down	GSG1L	protein_coding	down	0.85852	1	0.85852
AL355390.1	lincRNA	up	GSG1L	protein_coding	down	0.854538	1	0.854538
AP002784.1	lincRNA	up	GSG1L	protein_coding	down	0.852172	1	0.852172
AC004835.1	lincRNA	up	GSG1L	protein_coding	down	0.850528	1	0.850528
FAM129A	protein_coding	down	HAND2-AS1	lincRNA	down	0.928299	1	0.928299
GPM6A	protein_coding	down	HAND2-AS1	lincRNA	down	0.917798	1	0.917798
ADAMTSL3	protein_coding	down	HAND2-AS1	lincRNA	down	0.909695	1	0.909695
EPHA6	protein_coding	down	HAND2-AS1	lincRNA	down	0.887888	1	0.887888
FHL1	protein_coding	down	HAND2-AS1	lincRNA	down	0.887315	1	0.887315
EML1	protein_coding	down	HAND2-AS1	lincRNA	down	0.880255	1	0.880255
GNAO1	protein_coding	down	HAND2-AS1	lincRNA	down	0.872363	1	0.872363
CFL2	protein_coding	down	HAND2-AS1	lincRNA	down	0.860421	1	0.860421
ANK2	protein_coding	down	HAND2-AS1	lincRNA	down	0.857525	1	0.857525
GRIK3	protein_coding	down	HAND2-AS1	lincRNA	down	0.855954	1	0.855954
FRMPD4	protein_coding	down	HAND2-AS1	lincRNA	down	0.855802	1	0.855802
DMP1	protein_coding	up	HIF1A-AS2	lincRNA	up	0.948485	1	0.948485
AC079313.2	lincRNA	down	HLF	protein_coding	down	0.864666	1	0.864666
DCAF12L1	protein_coding	down	HMMR-AS1	lincRNA	up	0.860657	1	0.860657
AC092720.2	lincRNA	down	HPCAL4	protein_coding	down	0.891245	1	0.891245
AL513217.1	lincRNA	down	HSPB8	protein_coding	down	0.901489	1	0.901489
AL355607.1	lincRNA	down	HSPB8	protein_coding	down	0.894861	1	0.894861
AC079313.2	lincRNA	down	HSPB8	protein_coding	down	0.892108	1	0.892108
AC002398.2	lincRNA	down	HSPB8	protein_coding	down	0.891917	1	0.891917
AC010776.2	lincRNA	down	HSPB8	protein_coding	down	0.872799	1	0.872799
AF001548.1	lincRNA	down	HSPB8	protein_coding	down	0.870622	1	0.870622
HAND2-AS1	lincRNA	down	HSPB8	protein_coding	down	0.863737	1	0.863737
AC011306.1	lincRNA	down	HSPB8	protein_coding	down	0.851092	1	0.851092
GRIK1	protein_coding	down	IGF2BP2-AS1	lincRNA	up	0.85852	1	0.85852
AC034199.1	lincRNA	up	IL1RAP	protein_coding	up	0.861309	1	0.861309
AL117190.1	lincRNA	up	IL1RAP	protein_coding	up	0.85086	1	0.85086
GRIK1	protein_coding	down	IL20RB-AS1	lincRNA	up	0.871912	1	0.871912
DMP1	protein_coding	up	INHBA-AS1	lincRNA	up	0.90682	1	0.90682
GCM2	protein_coding	up	ISM1-AS1	lincRNA	up	0.884833	1	0.884833
GLRA1	protein_coding	up	ITGB5-AS1	lincRNA	up	0.867743	1	0.867743
GRIK1	protein_coding	down	ITGB5-AS1	lincRNA	up	0.858204	1	0.858204
GRIK1	protein_coding	down	JARID2-AS1	lincRNA	up	0.906824	1	0.906824
GCM2	protein_coding	up	JARID2-AS1	lincRNA	up	0.857372	1	0.857372
AC009102.2	lincRNA	down	KANK2	protein_coding	down	0.884308	1	0.884308
AC010776.2	lincRNA	down	KANK2	protein_coding	down	0.874972	1	0.874972
AC002398.2	lincRNA	down	KANK2	protein_coding	down	0.866568	1	0.866568
AL513217.1	lincRNA	down	KANK2	protein_coding	down	0.861811	1	0.861811
AL356489.2	lincRNA	down	KANK2	protein_coding	down	0.8578	1	0.8578
AF001548.1	lincRNA	down	KANK2	protein_coding	down	0.857473	1	0.857473
HAND2-AS1	lincRNA	down	KANK2	protein_coding	down	0.854409	1	0.854409
FENDRR	lincRNA	down	KANK2	protein_coding	down	0.850483	1	0.850483
AQP4-AS1	lincRNA	down	KCNA4	protein_coding	down	0.94579	1	0.94579
AL008638.6	lincRNA	up	KCNA4	protein_coding	down	0.941843	1	0.941843
AC026688.2	lincRNA	down	KCNA4	protein_coding	down	0.94181	1	0.94181
AP004147.1	lincRNA	up	KCNA4	protein_coding	down	0.941057	1	0.941057
AL355390.1	lincRNA	up	KCNA4	protein_coding	down	0.936014	1	0.936014
AL772337.2	lincRNA	down	KCNA4	protein_coding	down	0.931085	1	0.931085
AC016705.1	lincRNA	up	KCNA4	protein_coding	down	0.929717	1	0.929717
AC139099.2	lincRNA	down	KCNA4	protein_coding	down	0.929242	1	0.929242
AC073934.1	lincRNA	up	KCNA4	protein_coding	down	0.92381	1	0.92381
AP002784.1	lincRNA	up	KCNA4	protein_coding	down	0.920998	1	0.920998
AC004835.1	lincRNA	up	KCNA4	protein_coding	down	0.913753	1	0.913753
DDR1-DT	lincRNA	up	KCNA4	protein_coding	down	0.906569	1	0.906569
AC026369.1	lincRNA	up	KCNA4	protein_coding	down	0.904193	1	0.904193
AC018682.2	lincRNA	up	KCNA4	protein_coding	down	0.900831	1	0.900831
AC012508.1	lincRNA	up	KCNA4	protein_coding	down	0.899775	1	0.899775
GPRACR	lincRNA	down	KCNA4	protein_coding	down	0.894791	1	0.894791
AL117328.2	lincRNA	up	KCNA4	protein_coding	down	0.893441	1	0.893441
AC093390.1	lincRNA	down	KCNA4	protein_coding	down	0.892277	1	0.892277
AC145207.7	lincRNA	up	KCNA4	protein_coding	down	0.89097	1	0.89097
AC122719.2	lincRNA	up	KCNA4	protein_coding	down	0.887288	1	0.887288
AL157400.1	lincRNA	up	KCNA4	protein_coding	down	0.884188	1	0.884188
AC084346.1	lincRNA	up	KCNA4	protein_coding	down	0.883948	1	0.883948
AC126614.1	lincRNA	up	KCNA4	protein_coding	down	0.879431	1	0.879431
AC026469.1	lincRNA	down	KCNA4	protein_coding	down	0.87858	1	0.87858
AC023906.2	lincRNA	down	KCNA4	protein_coding	down	0.876371	1	0.876371
AL354919.1	lincRNA	up	KCNA4	protein_coding	down	0.876348	1	0.876348
C12orf80	lincRNA	up	KCNA4	protein_coding	down	0.875851	1	0.875851
CPEB1-AS1	lincRNA	down	KCNA4	protein_coding	down	0.874325	1	0.874325
AC037441.1	lincRNA	up	KCNA4	protein_coding	down	0.874159	1	0.874159
DBET	lincRNA	up	KCNA4	protein_coding	down	0.870706	1	0.870706
AL512604.3	lincRNA	up	KCNA4	protein_coding	down	0.86699	1	0.86699
AC135012.1	lincRNA	up	KCNA4	protein_coding	down	0.865704	1	0.865704
AC084064.1	lincRNA	down	KCNA4	protein_coding	down	0.865116	1	0.865116
AC093642.1	lincRNA	down	KCNA4	protein_coding	down	0.861223	1	0.861223
AC093496.1	lincRNA	up	KCNA4	protein_coding	down	0.860569	1	0.860569
AC109479.3	lincRNA	up	KCNA4	protein_coding	down	0.860271	1	0.860271
AC090844.3	lincRNA	up	KCNA4	protein_coding	down	0.85857	1	0.85857
AL096828.1	lincRNA	up	KCNA4	protein_coding	down	0.858328	1	0.858328
AP003064.2	lincRNA	down	KCNA4	protein_coding	down	0.857645	1	0.857645
AL138767.1	lincRNA	up	KCNA4	protein_coding	down	0.854485	1	0.854485
AC007920.1	lincRNA	down	KCNA4	protein_coding	down	0.853141	1	0.853141
AL445307.1	lincRNA	down	KCNA4	protein_coding	down	0.850975	1	0.850975
AC087855.2	lincRNA	down	KCNA4	protein_coding	down	0.850225	1	0.850225
ADAMTS9-AS2	lincRNA	down	KCNAB1	protein_coding	down	0.888099	1	0.888099
AC009102.2	lincRNA	down	KCNB1	protein_coding	down	0.87555	1	0.87555
AC002398.2	lincRNA	down	KCNB1	protein_coding	down	0.854749	1	0.854749
GPRACR	lincRNA	down	KCNC1	protein_coding	down	0.864808	1	0.864808
AL356489.2	lincRNA	down	KCNMA1	protein_coding	down	0.902259	1	0.902259
AC010776.2	lincRNA	down	KCNMA1	protein_coding	down	0.887844	1	0.887844
AL513217.1	lincRNA	down	KCNMA1	protein_coding	down	0.882683	1	0.882683
AC009102.2	lincRNA	down	KCNMA1	protein_coding	down	0.878625	1	0.878625
AC002398.2	lincRNA	down	KCNMA1	protein_coding	down	0.869692	1	0.869692
FENDRR	lincRNA	down	KCNMA1	protein_coding	down	0.864481	1	0.864481
AF001548.1	lincRNA	down	KCNMA1	protein_coding	down	0.861123	1	0.861123
AC036108.3	lincRNA	down	KCNMA1	protein_coding	down	0.855118	1	0.855118
HAND2-AS1	lincRNA	down	KCNMA1	protein_coding	down	0.851608	1	0.851608
GRIK1	protein_coding	down	KCNMA1-AS3	lincRNA	up	0.860022	1	0.860022
GLRA1	protein_coding	up	KCNMA1-AS3	lincRNA	up	0.851416	1	0.851416
AL451064.1	lincRNA	up	KCNMB2	protein_coding	down	0.87142	1	0.87142
AC007347.1	lincRNA	up	KCNMB2	protein_coding	down	0.850327	1	0.850327
GRIK1	protein_coding	down	KCNQ1OT1	lincRNA	up	0.854102	1	0.854102
DOCK9-AS1	lincRNA	up	KCTD4	protein_coding	down	0.955276	1	0.955276
AL031770.1	lincRNA	up	KCTD4	protein_coding	down	0.954222	1	0.954222
AL022097.1	lincRNA	up	KCTD4	protein_coding	down	0.944716	1	0.944716
AC092794.2	lincRNA	up	KCTD4	protein_coding	down	0.944079	1	0.944079
AL080317.2	lincRNA	up	KCTD4	protein_coding	down	0.94381	1	0.94381
AC073569.1	lincRNA	up	KCTD4	protein_coding	down	0.943502	1	0.943502
CFAP44-AS1	lincRNA	up	KCTD4	protein_coding	down	0.933496	1	0.933496
AC083806.2	lincRNA	up	KCTD4	protein_coding	down	0.931788	1	0.931788
ATP11A-AS1	lincRNA	up	KCTD4	protein_coding	down	0.927949	1	0.927949
AC012358.1	lincRNA	up	KCTD4	protein_coding	down	0.927382	1	0.927382
AC022540.1	lincRNA	up	KCTD4	protein_coding	down	0.927136	1	0.927136
AL139120.1	lincRNA	up	KCTD4	protein_coding	down	0.927095	1	0.927095
ITGB5-AS1	lincRNA	up	KCTD4	protein_coding	down	0.927085	1	0.927085
AL365356.1	lincRNA	up	KCTD4	protein_coding	down	0.926939	1	0.926939
AC016866.2	lincRNA	up	KCTD4	protein_coding	down	0.92681	1	0.92681
AP003696.1	lincRNA	up	KCTD4	protein_coding	down	0.926585	1	0.926585
AC104316.1	lincRNA	up	KCTD4	protein_coding	down	0.924503	1	0.924503
AC110792.2	lincRNA	up	KCTD4	protein_coding	down	0.924067	1	0.924067
AC006460.1	lincRNA	up	KCTD4	protein_coding	down	0.923702	1	0.923702
AL360091.3	lincRNA	up	KCTD4	protein_coding	down	0.923548	1	0.923548
AL138916.2	lincRNA	up	KCTD4	protein_coding	down	0.922831	1	0.922831
AC021739.4	lincRNA	up	KCTD4	protein_coding	down	0.921898	1	0.921898
AC022973.2	lincRNA	up	KCTD4	protein_coding	down	0.921183	1	0.921183
AC011092.2	lincRNA	up	KCTD4	protein_coding	down	0.920888	1	0.920888
AC022395.1	lincRNA	up	KCTD4	protein_coding	down	0.920808	1	0.920808
AC118555.1	lincRNA	up	KCTD4	protein_coding	down	0.920057	1	0.920057
AC069542.1	lincRNA	up	KCTD4	protein_coding	down	0.919971	1	0.919971
AL049820.1	lincRNA	up	KCTD4	protein_coding	down	0.918788	1	0.918788
AL357568.1	lincRNA	up	KCTD4	protein_coding	down	0.917558	1	0.917558
AC007285.2	lincRNA	up	KCTD4	protein_coding	down	0.917248	1	0.917248
AL392048.1	lincRNA	up	KCTD4	protein_coding	down	0.915957	1	0.915957
AL590006.1	lincRNA	up	KCTD4	protein_coding	down	0.914885	1	0.914885
AC087276.3	lincRNA	up	KCTD4	protein_coding	down	0.91454	1	0.91454
AL138820.1	lincRNA	up	KCTD4	protein_coding	down	0.914252	1	0.914252
AC078962.3	lincRNA	up	KCTD4	protein_coding	down	0.914099	1	0.914099
AC092338.2	lincRNA	up	KCTD4	protein_coding	down	0.914044	1	0.914044
CARNMT1-AS1	lincRNA	up	KCTD4	protein_coding	down	0.913913	1	0.913913
AC090772.2	lincRNA	up	KCTD4	protein_coding	down	0.913874	1	0.913874
BIRC6-AS1	lincRNA	up	KCTD4	protein_coding	down	0.913544	1	0.913544
AC074033.1	lincRNA	up	KCTD4	protein_coding	down	0.91336	1	0.91336
AC010401.1	lincRNA	up	KCTD4	protein_coding	down	0.911186	1	0.911186
AC106873.1	lincRNA	up	KCTD4	protein_coding	down	0.910833	1	0.910833
AC130650.2	lincRNA	up	KCTD4	protein_coding	down	0.910025	1	0.910025
AL355613.1	lincRNA	up	KCTD4	protein_coding	down	0.908944	1	0.908944
FO680682.1	lincRNA	up	KCTD4	protein_coding	down	0.908099	1	0.908099
AL139095.4	lincRNA	up	KCTD4	protein_coding	down	0.907986	1	0.907986
AF127577.2	lincRNA	up	KCTD4	protein_coding	down	0.905929	1	0.905929
AC010320.4	lincRNA	up	KCTD4	protein_coding	down	0.905734	1	0.905734
AC007314.1	lincRNA	up	KCTD4	protein_coding	down	0.904866	1	0.904866
AC080162.1	lincRNA	up	KCTD4	protein_coding	down	0.904841	1	0.904841
AC103739.2	lincRNA	up	KCTD4	protein_coding	down	0.90416	1	0.90416
AC044840.1	lincRNA	up	KCTD4	protein_coding	down	0.904048	1	0.904048
AC020900.1	lincRNA	up	KCTD4	protein_coding	down	0.90377	1	0.90377
AL157938.3	lincRNA	up	KCTD4	protein_coding	down	0.903011	1	0.903011
AC020661.2	lincRNA	up	KCTD4	protein_coding	down	0.902114	1	0.902114
AL138963.1	lincRNA	up	KCTD4	protein_coding	down	0.901907	1	0.901907
IGF2BP2-AS1	lincRNA	up	KCTD4	protein_coding	down	0.901703	1	0.901703
AL035634.1	lincRNA	up	KCTD4	protein_coding	down	0.900446	1	0.900446
AC005757.1	lincRNA	up	KCTD4	protein_coding	down	0.900059	1	0.900059
AL031668.1	lincRNA	up	KCTD4	protein_coding	down	0.899443	1	0.899443
FBXW7-AS1	lincRNA	up	KCTD4	protein_coding	down	0.898827	1	0.898827
AP003086.3	lincRNA	up	KCTD4	protein_coding	down	0.898815	1	0.898815
AC055764.1	lincRNA	up	KCTD4	protein_coding	down	0.897695	1	0.897695
AC138393.3	lincRNA	up	KCTD4	protein_coding	down	0.896242	1	0.896242
AC025030.2	lincRNA	up	KCTD4	protein_coding	down	0.895661	1	0.895661
AC007496.1	lincRNA	up	KCTD4	protein_coding	down	0.895231	1	0.895231
AC131971.1	lincRNA	up	KCTD4	protein_coding	down	0.894809	1	0.894809
AC100763.1	lincRNA	up	KCTD4	protein_coding	down	0.894809	1	0.894809
AC116158.1	lincRNA	up	KCTD4	protein_coding	down	0.894174	1	0.894174
AC093019.2	lincRNA	up	KCTD4	protein_coding	down	0.893582	1	0.893582
AC100821.2	lincRNA	up	KCTD4	protein_coding	down	0.893395	1	0.893395
AC004884.2	lincRNA	up	KCTD4	protein_coding	down	0.89336	1	0.89336
AC010978.1	lincRNA	up	KCTD4	protein_coding	down	0.892084	1	0.892084
AF178030.1	lincRNA	up	KCTD4	protein_coding	down	0.89202	1	0.89202
AC005021.1	lincRNA	up	KCTD4	protein_coding	down	0.891734	1	0.891734
AL513188.1	lincRNA	up	KCTD4	protein_coding	down	0.891695	1	0.891695
AC010976.1	lincRNA	up	KCTD4	protein_coding	down	0.891341	1	0.891341
AL158166.2	lincRNA	up	KCTD4	protein_coding	down	0.890682	1	0.890682
AC130650.1	lincRNA	up	KCTD4	protein_coding	down	0.889881	1	0.889881
AC022973.3	lincRNA	up	KCTD4	protein_coding	down	0.889546	1	0.889546
AC008277.1	lincRNA	up	KCTD4	protein_coding	down	0.889495	1	0.889495
AC078795.1	lincRNA	up	KCTD4	protein_coding	down	0.889419	1	0.889419
AC008507.2	lincRNA	up	KCTD4	protein_coding	down	0.889108	1	0.889108
AL049637.1	lincRNA	up	KCTD4	protein_coding	down	0.88878	1	0.88878
AC025031.4	lincRNA	up	KCTD4	protein_coding	down	0.888778	1	0.888778
JARID2-AS1	lincRNA	up	KCTD4	protein_coding	down	0.888631	1	0.888631
AC018557.2	lincRNA	up	KCTD4	protein_coding	down	0.888424	1	0.888424
AL354733.2	lincRNA	up	KCTD4	protein_coding	down	0.888276	1	0.888276
AC136424.2	lincRNA	up	KCTD4	protein_coding	down	0.887776	1	0.887776
AF107885.2	lincRNA	up	KCTD4	protein_coding	down	0.887527	1	0.887527
AP001178.2	lincRNA	up	KCTD4	protein_coding	down	0.886905	1	0.886905
B4GALT4-AS1	lincRNA	up	KCTD4	protein_coding	down	0.885652	1	0.885652
AC114763.2	lincRNA	up	KCTD4	protein_coding	down	0.885408	1	0.885408
AC018878.1	lincRNA	up	KCTD4	protein_coding	down	0.885089	1	0.885089
AC090589.2	lincRNA	up	KCTD4	protein_coding	down	0.884846	1	0.884846
AC009303.3	lincRNA	up	KCTD4	protein_coding	down	0.884674	1	0.884674
AC008781.2	lincRNA	up	KCTD4	protein_coding	down	0.884115	1	0.884115
AC087521.2	lincRNA	up	KCTD4	protein_coding	down	0.884061	1	0.884061
AC018442.2	lincRNA	up	KCTD4	protein_coding	down	0.883193	1	0.883193
INO80-AS1	lincRNA	up	KCTD4	protein_coding	down	0.882693	1	0.882693
AL445248.1	lincRNA	up	KCTD4	protein_coding	down	0.882411	1	0.882411
AL023584.2	lincRNA	up	KCTD4	protein_coding	down	0.882383	1	0.882383
AC025031.1	lincRNA	up	KCTD4	protein_coding	down	0.882046	1	0.882046
AC018462.1	lincRNA	up	KCTD4	protein_coding	down	0.881774	1	0.881774
AC091946.2	lincRNA	up	KCTD4	protein_coding	down	0.881717	1	0.881717
AP002884.2	lincRNA	up	KCTD4	protein_coding	down	0.881716	1	0.881716
AC016746.1	lincRNA	up	KCTD4	protein_coding	down	0.881583	1	0.881583
ARNTL2-AS1	lincRNA	up	KCTD4	protein_coding	down	0.881281	1	0.881281
AL645504.1	lincRNA	up	KCTD4	protein_coding	down	0.881033	1	0.881033
AL590723.1	lincRNA	up	KCTD4	protein_coding	down	0.880235	1	0.880235
HMGA2-AS1	lincRNA	up	KCTD4	protein_coding	down	0.880169	1	0.880169
AC009365.3	lincRNA	up	KCTD4	protein_coding	down	0.879446	1	0.879446
AC007731.3	lincRNA	up	KCTD4	protein_coding	down	0.879273	1	0.879273
AC007216.4	lincRNA	up	KCTD4	protein_coding	down	0.878998	1	0.878998
AC013476.1	lincRNA	up	KCTD4	protein_coding	down	0.878933	1	0.878933
AC020611.2	lincRNA	up	KCTD4	protein_coding	down	0.878909	1	0.878909
AC010834.3	lincRNA	up	KCTD4	protein_coding	down	0.878448	1	0.878448
AP005131.1	lincRNA	up	KCTD4	protein_coding	down	0.878421	1	0.878421
AC009542.1	lincRNA	up	KCTD4	protein_coding	down	0.878355	1	0.878355
AC068533.3	lincRNA	up	KCTD4	protein_coding	down	0.87795	1	0.87795
AC087501.1	lincRNA	up	KCTD4	protein_coding	down	0.877451	1	0.877451
AC011405.1	lincRNA	up	KCTD4	protein_coding	down	0.877299	1	0.877299
AL356805.1	lincRNA	up	KCTD4	protein_coding	down	0.876755	1	0.876755
AL035071.2	lincRNA	up	KCTD4	protein_coding	down	0.876369	1	0.876369
AC004672.1	lincRNA	up	KCTD4	protein_coding	down	0.875124	1	0.875124
AC008700.1	lincRNA	up	KCTD4	protein_coding	down	0.874969	1	0.874969
AP000487.2	lincRNA	up	KCTD4	protein_coding	down	0.874866	1	0.874866
AC090673.1	lincRNA	up	KCTD4	protein_coding	down	0.874509	1	0.874509
AC092839.2	lincRNA	up	KCTD4	protein_coding	down	0.874382	1	0.874382
AC013640.1	lincRNA	up	KCTD4	protein_coding	down	0.873863	1	0.873863
AC096708.2	lincRNA	up	KCTD4	protein_coding	down	0.873732	1	0.873732
AP001381.1	lincRNA	up	KCTD4	protein_coding	down	0.873662	1	0.873662
AC117834.1	lincRNA	up	KCTD4	protein_coding	down	0.873463	1	0.873463
AL451070.1	lincRNA	up	KCTD4	protein_coding	down	0.873304	1	0.873304
AL442071.1	lincRNA	up	KCTD4	protein_coding	down	0.872972	1	0.872972
AC022973.4	lincRNA	up	KCTD4	protein_coding	down	0.872486	1	0.872486
AC064874.1	lincRNA	up	KCTD4	protein_coding	down	0.871925	1	0.871925
AC024475.1	lincRNA	up	KCTD4	protein_coding	down	0.871787	1	0.871787
AP002336.2	lincRNA	up	KCTD4	protein_coding	down	0.871522	1	0.871522
AC007347.1	lincRNA	up	KCTD4	protein_coding	down	0.870742	1	0.870742
AP002518.1	lincRNA	up	KCTD4	protein_coding	down	0.870544	1	0.870544
AL132989.2	lincRNA	up	KCTD4	protein_coding	down	0.870504	1	0.870504
AL157938.2	lincRNA	up	KCTD4	protein_coding	down	0.870045	1	0.870045
AL160163.1	lincRNA	up	KCTD4	protein_coding	down	0.86942	1	0.86942
KCNQ1OT1	lincRNA	up	KCTD4	protein_coding	down	0.869302	1	0.869302
AC020661.3	lincRNA	up	KCTD4	protein_coding	down	0.868825	1	0.868825
AC108063.1	lincRNA	up	KCTD4	protein_coding	down	0.868688	1	0.868688
AL391839.1	lincRNA	up	KCTD4	protein_coding	down	0.868527	1	0.868527
AC234772.2	lincRNA	up	KCTD4	protein_coding	down	0.868473	1	0.868473
AC127164.1	lincRNA	up	KCTD4	protein_coding	down	0.868286	1	0.868286
AC100800.1	lincRNA	up	KCTD4	protein_coding	down	0.86799	1	0.86799
AC092338.3	lincRNA	up	KCTD4	protein_coding	down	0.867961	1	0.867961
AL359094.1	lincRNA	up	KCTD4	protein_coding	down	0.86787	1	0.86787
DIAPH3-AS2	lincRNA	up	KCTD4	protein_coding	down	0.867674	1	0.867674
AC016910.1	lincRNA	up	KCTD4	protein_coding	down	0.867462	1	0.867462
AC022893.3	lincRNA	up	KCTD4	protein_coding	down	0.866357	1	0.866357
AC007336.1	lincRNA	up	KCTD4	protein_coding	down	0.865991	1	0.865991
AC037487.2	lincRNA	up	KCTD4	protein_coding	down	0.865746	1	0.865746
AC044781.1	lincRNA	up	KCTD4	protein_coding	down	0.865744	1	0.865744
AC004158.1	lincRNA	up	KCTD4	protein_coding	down	0.865288	1	0.865288
AC012213.3	lincRNA	up	KCTD4	protein_coding	down	0.865252	1	0.865252
AC011825.2	lincRNA	up	KCTD4	protein_coding	down	0.865181	1	0.865181
AC008474.1	lincRNA	up	KCTD4	protein_coding	down	0.865005	1	0.865005
AC113143.1	lincRNA	up	KCTD4	protein_coding	down	0.864221	1	0.864221
AC109597.1	lincRNA	up	KCTD4	protein_coding	down	0.864138	1	0.864138
AC139792.1	lincRNA	up	KCTD4	protein_coding	down	0.863872	1	0.863872
AL391863.2	lincRNA	up	KCTD4	protein_coding	down	0.863709	1	0.863709
AL162385.2	lincRNA	up	KCTD4	protein_coding	down	0.863491	1	0.863491
AL353771.1	lincRNA	up	KCTD4	protein_coding	down	0.863314	1	0.863314
DENND6A-AS1	lincRNA	up	KCTD4	protein_coding	down	0.862842	1	0.862842
AC022400.2	lincRNA	up	KCTD4	protein_coding	down	0.862723	1	0.862723
AC004943.1	lincRNA	up	KCTD4	protein_coding	down	0.862198	1	0.862198
AC131182.1	lincRNA	up	KCTD4	protein_coding	down	0.861524	1	0.861524
AC073575.1	lincRNA	up	KCTD4	protein_coding	down	0.860996	1	0.860996
ETS1-AS1	lincRNA	up	KCTD4	protein_coding	down	0.860835	1	0.860835
AC104982.1	lincRNA	up	KCTD4	protein_coding	down	0.860104	1	0.860104
AC005920.2	lincRNA	up	KCTD4	protein_coding	down	0.860033	1	0.860033
AC010285.1	lincRNA	up	KCTD4	protein_coding	down	0.859828	1	0.859828
AP002907.1	lincRNA	up	KCTD4	protein_coding	down	0.859752	1	0.859752
AL121957.1	lincRNA	up	KCTD4	protein_coding	down	0.85975	1	0.85975
AC008243.1	lincRNA	up	KCTD4	protein_coding	down	0.859657	1	0.859657
AC079035.1	lincRNA	up	KCTD4	protein_coding	down	0.859376	1	0.859376
AC015987.1	lincRNA	up	KCTD4	protein_coding	down	0.859022	1	0.859022
AL450226.1	lincRNA	up	KCTD4	protein_coding	down	0.859021	1	0.859021
BACH1-IT2	lincRNA	up	KCTD4	protein_coding	down	0.858903	1	0.858903
AC007448.2	lincRNA	up	KCTD4	protein_coding	down	0.858873	1	0.858873
AL391863.1	lincRNA	up	KCTD4	protein_coding	down	0.858429	1	0.858429
AC108463.3	lincRNA	up	KCTD4	protein_coding	down	0.858342	1	0.858342
AC090518.1	lincRNA	up	KCTD4	protein_coding	down	0.858001	1	0.858001
AL035658.1	lincRNA	up	KCTD4	protein_coding	down	0.857691	1	0.857691
AC055733.2	lincRNA	up	KCTD4	protein_coding	down	0.856225	1	0.856225
AC009948.2	lincRNA	up	KCTD4	protein_coding	down	0.856169	1	0.856169
AL034349.1	lincRNA	up	KCTD4	protein_coding	down	0.856097	1	0.856097
AIRN	lincRNA	up	KCTD4	protein_coding	down	0.855907	1	0.855907
ENOX1-AS1	lincRNA	up	KCTD4	protein_coding	down	0.855783	1	0.855783
AC027018.1	lincRNA	up	KCTD4	protein_coding	down	0.855569	1	0.855569
AC073957.1	lincRNA	up	KCTD4	protein_coding	down	0.855276	1	0.855276
CNOT10-AS1	lincRNA	up	KCTD4	protein_coding	down	0.854505	1	0.854505
AL049830.3	lincRNA	up	KCTD4	protein_coding	down	0.85449	1	0.85449
AL731563.3	lincRNA	up	KCTD4	protein_coding	down	0.854368	1	0.854368
AC007938.2	lincRNA	up	KCTD4	protein_coding	down	0.854348	1	0.854348
AC022872.1	lincRNA	up	KCTD4	protein_coding	down	0.854089	1	0.854089
AC005899.8	lincRNA	up	KCTD4	protein_coding	down	0.8536	1	0.8536
AC072039.2	lincRNA	up	KCTD4	protein_coding	down	0.853506	1	0.853506
DLEU2	lincRNA	up	KCTD4	protein_coding	down	0.853331	1	0.853331
AL161909.2	lincRNA	up	KCTD4	protein_coding	down	0.853239	1	0.853239
KCNMA1-AS3	lincRNA	up	KCTD4	protein_coding	down	0.853179	1	0.853179
AL021328.1	lincRNA	up	KCTD4	protein_coding	down	0.852966	1	0.852966
AP001001.1	lincRNA	up	KCTD4	protein_coding	down	0.852951	1	0.852951
AL118556.1	lincRNA	up	KCTD4	protein_coding	down	0.852851	1	0.852851
ITCH-AS1	lincRNA	up	KCTD4	protein_coding	down	0.852141	1	0.852141
AP000763.3	lincRNA	up	KCTD4	protein_coding	down	0.851741	1	0.851741
AL499616.1	lincRNA	up	KCTD4	protein_coding	down	0.850564	1	0.850564
ADAMTS9-AS2	lincRNA	down	KIAA0408	protein_coding	down	0.851088	1	0.851088
AC106895.2	lincRNA	down	KLHL1	protein_coding	down	0.854712	1	0.854712
GRIK1	protein_coding	down	LATS2-AS1	lincRNA	up	0.92988	1	0.92988
GCM2	protein_coding	up	LATS2-AS1	lincRNA	up	0.891591	1	0.891591
KCTD4	protein_coding	down	LATS2-AS1	lincRNA	up	0.877562	1	0.877562
AC002398.2	lincRNA	down	LDB3	protein_coding	down	0.907174	1	0.907174
AF001548.1	lincRNA	down	LDB3	protein_coding	down	0.903908	1	0.903908
AL513217.1	lincRNA	down	LDB3	protein_coding	down	0.887558	1	0.887558
AC079313.2	lincRNA	down	LDB3	protein_coding	down	0.879163	1	0.879163
AC036108.3	lincRNA	down	LDB3	protein_coding	down	0.867025	1	0.867025
AL355607.1	lincRNA	down	LDB3	protein_coding	down	0.862772	1	0.862772
AC009102.2	lincRNA	down	LDB3	protein_coding	down	0.861404	1	0.861404
ATP2B2	protein_coding	down	LHX1-DT	lincRNA	up	0.866361	1	0.866361
BOLL	protein_coding	up	LINC00276	lincRNA	up	0.902704	1	0.902704
GPR26	protein_coding	down	LINC00384	lincRNA	up	0.918152	1	0.918152
CLRN1	protein_coding	up	LINC00384	lincRNA	up	0.882415	1	0.882415
GRIA2	protein_coding	down	LINC00384	lincRNA	up	0.874055	1	0.874055
KCTD4	protein_coding	down	LINC00456	lincRNA	up	0.871305	1	0.871305
GCM2	protein_coding	up	LINC00538	lincRNA	up	0.888217	1	0.888217
GRIK1	protein_coding	down	LINC00538	lincRNA	up	0.85947	1	0.85947
GCM2	protein_coding	up	LINC00562	lincRNA	up	0.880369	1	0.880369
GRIK1	protein_coding	down	LINC00624	lincRNA	up	0.875832	1	0.875832
KCTD4	protein_coding	down	LINC00624	lincRNA	up	0.868729	1	0.868729
DMP1	protein_coding	up	LINC00862	lincRNA	up	0.889762	1	0.889762
KCTD4	protein_coding	down	LINC00862	lincRNA	up	0.85436	1	0.85436
DMP1	protein_coding	up	LINC01050	lincRNA	up	0.910129	1	0.910129
CELA1	protein_coding	down	LINC01257	lincRNA	up	0.890626	1	0.890626
DCAF12L1	protein_coding	down	LINC01257	lincRNA	up	0.879119	1	0.879119
KCNA4	protein_coding	down	LINC01257	lincRNA	up	0.876869	1	0.876869
GAL3ST3	protein_coding	down	LINC01257	lincRNA	up	0.864136	1	0.864136
KCNAB1	protein_coding	down	LINC01266	lincRNA	down	0.878021	1	0.878021
GRIK1	protein_coding	down	LINC01266	lincRNA	down	0.875988	1	0.875988
KCTD4	protein_coding	down	LINC01266	lincRNA	down	0.86853	1	0.86853
FIGN	protein_coding	down	LINC01266	lincRNA	down	0.855388	1	0.855388
DMP1	protein_coding	up	LINC01338	lincRNA	up	0.94333	1	0.94333
DCAF12L1	protein_coding	down	LINC01391	lincRNA	up	0.940325	1	0.940325
KCNA4	protein_coding	down	LINC01391	lincRNA	up	0.933913	1	0.933913
CELA1	protein_coding	down	LINC01391	lincRNA	up	0.916376	1	0.916376
GAL3ST3	protein_coding	down	LINC01391	lincRNA	up	0.901464	1	0.901464
GSG1L	protein_coding	down	LINC01391	lincRNA	up	0.862065	1	0.862065
BOLL	protein_coding	up	LINC01473	lincRNA	up	0.869238	1	0.869238
BOLL	protein_coding	up	LINC01483	lincRNA	up	0.899441	1	0.899441
GRM5	protein_coding	up	LINC01483	lincRNA	up	0.855627	1	0.855627
BOLL	protein_coding	up	LINC01524	lincRNA	up	0.891537	1	0.891537
DCAF12L1	protein_coding	down	LINC01532	lincRNA	down	0.932614	1	0.932614
KCNA4	protein_coding	down	LINC01532	lincRNA	down	0.921729	1	0.921729
CALN1	protein_coding	down	LINC01532	lincRNA	down	0.875956	1	0.875956
GSG1L	protein_coding	down	LINC01532	lincRNA	down	0.865212	1	0.865212
CELA1	protein_coding	down	LINC01532	lincRNA	down	0.859615	1	0.859615
ATAD5	protein_coding	up	LINC01572	lincRNA	up	0.864146	1	0.864146
GLRA1	protein_coding	up	LINC01592	lincRNA	up	0.906433	1	0.906433
CLRN1	protein_coding	up	LINC01600	lincRNA	up	0.853223	1	0.853223
DCAF12L1	protein_coding	down	LINC01701	lincRNA	up	0.892874	1	0.892874
KCNA4	protein_coding	down	LINC01701	lincRNA	up	0.870156	1	0.870156
CELA1	protein_coding	down	LINC01701	lincRNA	up	0.868266	1	0.868266
GAL3ST3	protein_coding	down	LINC01701	lincRNA	up	0.858169	1	0.858169
BOLL	protein_coding	up	LINC01722	lincRNA	up	0.900151	1	0.900151
DCAF12L1	protein_coding	down	LINC01747	lincRNA	up	0.874746	1	0.874746
GLRA1	protein_coding	up	LINC01796	lincRNA	up	0.919414	1	0.919414
GRIK1	protein_coding	down	LINC01796	lincRNA	up	0.907586	1	0.907586
KCTD4	protein_coding	down	LINC01796	lincRNA	up	0.902417	1	0.902417
DMP1	protein_coding	up	LINC01851	lincRNA	up	0.861869	1	0.861869
DCAF12L1	protein_coding	down	LINC01907	lincRNA	down	0.922253	1	0.922253
KCNA4	protein_coding	down	LINC01907	lincRNA	down	0.921481	1	0.921481
CELA1	protein_coding	down	LINC01907	lincRNA	down	0.890786	1	0.890786
GCM2	protein_coding	up	LINC01931	lincRNA	up	0.966014	1	0.966014
GRIK1	protein_coding	down	LINC01931	lincRNA	up	0.916119	1	0.916119
DPYSL5	protein_coding	down	LINC01976	lincRNA	down	0.890108	1	0.890108
CUX2	protein_coding	down	LINC01976	lincRNA	down	0.867369	1	0.867369
HCN4	protein_coding	down	LINC01976	lincRNA	down	0.858254	1	0.858254
CD200R1	protein_coding	down	LINC02042	lincRNA	up	0.888758	1	0.888758
DPYSL5	protein_coding	down	LINC02078	lincRNA	down	0.868523	1	0.868523
CUX2	protein_coding	down	LINC02078	lincRNA	down	0.866988	1	0.866988
HCN4	protein_coding	down	LINC02078	lincRNA	down	0.865538	1	0.865538
GLRA1	protein_coding	up	LINC02112	lincRNA	up	0.858976	1	0.858976
GRIA2	protein_coding	down	LINC02141	lincRNA	up	0.856343	1	0.856343
KLHL1	protein_coding	down	LINC02141	lincRNA	up	0.853384	1	0.853384
ARPP21	protein_coding	down	LINC02141	lincRNA	up	0.851833	1	0.851833
GRM5	protein_coding	up	LINC02181	lincRNA	up	0.869021	1	0.869021
BOLL	protein_coding	up	LINC02181	lincRNA	up	0.851752	1	0.851752
DCAF12L1	protein_coding	down	LINC02208	lincRNA	up	0.870854	1	0.870854
KCNA4	protein_coding	down	LINC02208	lincRNA	up	0.861317	1	0.861317
CALN1	protein_coding	down	LINC02208	lincRNA	up	0.858825	1	0.858825
DCAF12L1	protein_coding	down	LINC02348	lincRNA	up	0.896707	1	0.896707
KCNA4	protein_coding	down	LINC02348	lincRNA	up	0.864284	1	0.864284
CELA1	protein_coding	down	LINC02348	lincRNA	up	0.863	1	0.863
GAL3ST3	protein_coding	down	LINC02348	lincRNA	up	0.856933	1	0.856933
BOLL	protein_coding	up	LINC02433	lincRNA	up	0.877303	1	0.877303
DMP1	protein_coding	up	LINC02507	lincRNA	up	0.851214	1	0.851214
GCM2	protein_coding	up	LINC02516	lincRNA	up	0.866785	1	0.866785
DMP1	protein_coding	up	LINC02539	lincRNA	up	0.895512	1	0.895512
KCNA4	protein_coding	down	LINC02547	lincRNA	up	0.932738	1	0.932738
DCAF12L1	protein_coding	down	LINC02547	lincRNA	up	0.92747	1	0.92747
CELA1	protein_coding	down	LINC02547	lincRNA	up	0.90574	1	0.90574
CALN1	protein_coding	down	LINC02547	lincRNA	up	0.851837	1	0.851837
DCAF12L1	protein_coding	down	LINC02554	lincRNA	down	0.954988	1	0.954988
KCNA4	protein_coding	down	LINC02554	lincRNA	down	0.929778	1	0.929778
CELA1	protein_coding	down	LINC02554	lincRNA	down	0.917276	1	0.917276
GAL3ST3	protein_coding	down	LINC02554	lincRNA	down	0.890739	1	0.890739
GSG1L	protein_coding	down	LINC02554	lincRNA	down	0.879184	1	0.879184
CALN1	protein_coding	down	LINC02554	lincRNA	down	0.863542	1	0.863542
KCNC1	protein_coding	down	LINC02554	lincRNA	down	0.855984	1	0.855984
ARPP21	protein_coding	down	LINC02599	lincRNA	down	0.870835	1	0.870835
KLHL1	protein_coding	down	LINC02599	lincRNA	down	0.851891	1	0.851891
DMP1	protein_coding	up	LINC02656	lincRNA	up	0.874789	1	0.874789
DMP1	protein_coding	up	LIPC-AS1	lincRNA	up	0.868878	1	0.868878
AC036108.3	lincRNA	down	LMO3	protein_coding	down	0.86561	1	0.86561
AL356489.2	lincRNA	down	LMO3	protein_coding	down	0.852451	1	0.852451
AC110491.1	lincRNA	down	LONRF2	protein_coding	down	0.882908	1	0.882908
AC036108.3	lincRNA	down	LONRF2	protein_coding	down	0.867977	1	0.867977
HAND2-AS1	lincRNA	down	LONRF2	protein_coding	down	0.863798	1	0.863798
AC009102.2	lincRNA	down	LONRF2	protein_coding	down	0.861778	1	0.861778
AL356489.2	lincRNA	down	LONRF2	protein_coding	down	0.851053	1	0.851053
AC011472.4	lincRNA	down	LPP	protein_coding	down	0.894277	1	0.894277
AC110813.1	lincRNA	down	LPP	protein_coding	down	0.88497	1	0.88497
ADAMTS9-AS2	lincRNA	down	LPP	protein_coding	down	0.872608	1	0.872608
AC009303.3	lincRNA	up	LPP	protein_coding	down	0.870552	1	0.870552
AC104984.6	lincRNA	up	LPP	protein_coding	down	0.867689	1	0.867689
AC037487.2	lincRNA	up	LPP	protein_coding	down	0.867485	1	0.867485
AL034349.1	lincRNA	up	LPP	protein_coding	down	0.866054	1	0.866054
AP005131.1	lincRNA	up	LPP	protein_coding	down	0.865849	1	0.865849
AC116158.1	lincRNA	up	LPP	protein_coding	down	0.864504	1	0.864504
AC008277.1	lincRNA	up	LPP	protein_coding	down	0.864179	1	0.864179
AC024475.1	lincRNA	up	LPP	protein_coding	down	0.863245	1	0.863245
AC026401.1	lincRNA	up	LPP	protein_coding	down	0.86267	1	0.86267
AC009480.1	lincRNA	up	LPP	protein_coding	down	0.860752	1	0.860752
AL049820.1	lincRNA	up	LPP	protein_coding	down	0.860341	1	0.860341
AC104984.3	lincRNA	up	LPP	protein_coding	down	0.859362	1	0.859362
AL391097.1	lincRNA	up	LPP	protein_coding	down	0.859156	1	0.859156
AC010978.1	lincRNA	up	LPP	protein_coding	down	0.857979	1	0.857979
AC009269.2	lincRNA	up	LPP	protein_coding	down	0.857361	1	0.857361
AC096741.1	lincRNA	up	LPP	protein_coding	down	0.85632	1	0.85632
AL357568.1	lincRNA	up	LPP	protein_coding	down	0.855998	1	0.855998
AF127577.2	lincRNA	up	LPP	protein_coding	down	0.855742	1	0.855742
AC018462.1	lincRNA	up	LPP	protein_coding	down	0.855509	1	0.855509
AC106801.1	lincRNA	up	LPP	protein_coding	down	0.853877	1	0.853877
AC110792.2	lincRNA	up	LPP	protein_coding	down	0.853875	1	0.853875
AL117339.4	lincRNA	up	LPP	protein_coding	down	0.853741	1	0.853741
AC013549.1	lincRNA	up	LPP	protein_coding	down	0.853534	1	0.853534
AL357078.3	lincRNA	up	LPP	protein_coding	down	0.853483	1	0.853483
AL356124.1	lincRNA	up	LPP	protein_coding	down	0.85322	1	0.85322
CACNA1C-AS4	lincRNA	up	LPP	protein_coding	down	0.851217	1	0.851217
AC087286.1	lincRNA	up	LPP	protein_coding	down	0.850647	1	0.850647
GRIK1	protein_coding	down	LPP-AS1	lincRNA	up	0.888434	1	0.888434
LPP	protein_coding	down	LPP-AS1	lincRNA	up	0.875998	1	0.875998
KCTD4	protein_coding	down	LPP-AS1	lincRNA	up	0.873938	1	0.873938
GLRA1	protein_coding	up	LPP-AS1	lincRNA	up	0.854555	1	0.854555
AC016027.1	lincRNA	down	LRRC19	protein_coding	down	0.858622	1	0.858622
AP001001.1	lincRNA	up	LRRC7	protein_coding	down	0.875708	1	0.875708
AC234772.2	lincRNA	up	LRRC7	protein_coding	down	0.870805	1	0.870805
AC116158.1	lincRNA	up	LRRC7	protein_coding	down	0.870167	1	0.870167
AL391097.1	lincRNA	up	LRRC7	protein_coding	down	0.869158	1	0.869158
AL353771.1	lincRNA	up	LRRC7	protein_coding	down	0.869006	1	0.869006
AC019080.4	lincRNA	up	LRRC7	protein_coding	down	0.867956	1	0.867956
AL117339.4	lincRNA	up	LRRC7	protein_coding	down	0.867228	1	0.867228
AL499616.1	lincRNA	up	LRRC7	protein_coding	down	0.863717	1	0.863717
AC027228.1	lincRNA	up	LRRC7	protein_coding	down	0.863507	1	0.863507
AC106801.1	lincRNA	up	LRRC7	protein_coding	down	0.862599	1	0.862599
AC009303.3	lincRNA	up	LRRC7	protein_coding	down	0.862278	1	0.862278
AC009480.1	lincRNA	up	LRRC7	protein_coding	down	0.861744	1	0.861744
AC096741.1	lincRNA	up	LRRC7	protein_coding	down	0.86156	1	0.86156
AC018462.1	lincRNA	up	LRRC7	protein_coding	down	0.859737	1	0.859737
AC008277.1	lincRNA	up	LRRC7	protein_coding	down	0.858553	1	0.858553
AC009269.2	lincRNA	up	LRRC7	protein_coding	down	0.858511	1	0.858511
AC104984.6	lincRNA	up	LRRC7	protein_coding	down	0.858441	1	0.858441
LPP-AS1	lincRNA	up	LRRC7	protein_coding	down	0.858374	1	0.858374
AC016910.1	lincRNA	up	LRRC7	protein_coding	down	0.858165	1	0.858165
AC010285.1	lincRNA	up	LRRC7	protein_coding	down	0.857161	1	0.857161
AC025030.2	lincRNA	up	LRRC7	protein_coding	down	0.855049	1	0.855049
AL118556.1	lincRNA	up	LRRC7	protein_coding	down	0.855019	1	0.855019
AF127577.2	lincRNA	up	LRRC7	protein_coding	down	0.854909	1	0.854909
AC019270.1	lincRNA	up	LRRC7	protein_coding	down	0.854314	1	0.854314
AP002812.3	lincRNA	up	LRRC7	protein_coding	down	0.854174	1	0.854174
DMP1	protein_coding	up	LUCAT1	lincRNA	up	0.913679	1	0.913679
KCTD4	protein_coding	down	LURAP1L-AS1	lincRNA	up	0.855089	1	0.855089
GRIA2	protein_coding	down	LY86-AS1	lincRNA	down	0.875817	1	0.875817
ARPP21	protein_coding	down	LY86-AS1	lincRNA	down	0.870441	1	0.870441
HAND2-AS1	lincRNA	down	MAB21L2	protein_coding	down	0.905475	1	0.905475
AC010776.2	lincRNA	down	MAB21L2	protein_coding	down	0.901455	1	0.901455
AF001548.1	lincRNA	down	MAB21L2	protein_coding	down	0.881931	1	0.881931
AC011306.1	lincRNA	down	MAB21L2	protein_coding	down	0.879142	1	0.879142
AL356489.2	lincRNA	down	MAB21L2	protein_coding	down	0.87823	1	0.87823
AL513217.1	lincRNA	down	MAB21L2	protein_coding	down	0.872086	1	0.872086
AL355607.1	lincRNA	down	MAB21L2	protein_coding	down	0.871738	1	0.871738
AC002398.2	lincRNA	down	MAB21L2	protein_coding	down	0.864659	1	0.864659
AC009102.2	lincRNA	down	MAB21L2	protein_coding	down	0.857822	1	0.857822
FENDRR	lincRNA	down	MAB21L2	protein_coding	down	0.853213	1	0.853213
AC079313.2	lincRNA	down	MAB21L2	protein_coding	down	0.851363	1	0.851363
KCTD4	protein_coding	down	MACC1-AS1	lincRNA	up	0.856066	1	0.856066
GLRA1	protein_coding	up	MAL2-AS1	lincRNA	up	0.855222	1	0.855222
HAND2-AS1	lincRNA	down	MAMDC2	protein_coding	down	0.862248	1	0.862248
GCM2	protein_coding	up	MANEA-DT	lincRNA	up	0.870772	1	0.870772
GRIK1	protein_coding	down	MANEA-DT	lincRNA	up	0.862173	1	0.862173
AF001548.1	lincRNA	down	MAPK4	protein_coding	down	0.880593	1	0.880593
HAND2-AS1	lincRNA	down	MAPK4	protein_coding	down	0.880563	1	0.880563
AC002398.2	lincRNA	down	MAPK4	protein_coding	down	0.877011	1	0.877011
AC009102.2	lincRNA	down	MAPK4	protein_coding	down	0.87309	1	0.87309
AL513217.1	lincRNA	down	MAPK4	protein_coding	down	0.856454	1	0.856454
AL356489.2	lincRNA	down	MAPK4	protein_coding	down	0.855977	1	0.855977
AC010776.2	lincRNA	down	MASP1	protein_coding	down	0.85566	1	0.85566
BVES	protein_coding	down	MBNL1-AS1	lincRNA	down	0.945894	1	0.945894
CHRM2	protein_coding	down	MBNL1-AS1	lincRNA	down	0.922349	1	0.922349
ATP2B4	protein_coding	down	MBNL1-AS1	lincRNA	down	0.920604	1	0.920604
CFL2	protein_coding	down	MBNL1-AS1	lincRNA	down	0.91955	1	0.91955
KCNMA1	protein_coding	down	MBNL1-AS1	lincRNA	down	0.914532	1	0.914532
MAB21L2	protein_coding	down	MBNL1-AS1	lincRNA	down	0.910788	1	0.910788
CALD1	protein_coding	down	MBNL1-AS1	lincRNA	down	0.906259	1	0.906259
DIXDC1	protein_coding	down	MBNL1-AS1	lincRNA	down	0.90326	1	0.90326
HSPB8	protein_coding	down	MBNL1-AS1	lincRNA	down	0.90275	1	0.90275
LDB3	protein_coding	down	MBNL1-AS1	lincRNA	down	0.901177	1	0.901177
LMO3	protein_coding	down	MBNL1-AS1	lincRNA	down	0.900668	1	0.900668
ANGPTL1	protein_coding	down	MBNL1-AS1	lincRNA	down	0.899087	1	0.899087
DNAJB5	protein_coding	down	MBNL1-AS1	lincRNA	down	0.898318	1	0.898318
DES	protein_coding	down	MBNL1-AS1	lincRNA	down	0.890322	1	0.890322
DACT3	protein_coding	down	MBNL1-AS1	lincRNA	down	0.888781	1	0.888781
CPEB1	protein_coding	down	MBNL1-AS1	lincRNA	down	0.885524	1	0.885524
FERMT2	protein_coding	down	MBNL1-AS1	lincRNA	down	0.883265	1	0.883265
GPM6A	protein_coding	down	MBNL1-AS1	lincRNA	down	0.880504	1	0.880504
FAM129A	protein_coding	down	MBNL1-AS1	lincRNA	down	0.879185	1	0.879185
AKAP6	protein_coding	down	MBNL1-AS1	lincRNA	down	0.87874	1	0.87874
ADAMTSL3	protein_coding	down	MBNL1-AS1	lincRNA	down	0.877286	1	0.877286
GNAO1	protein_coding	down	MBNL1-AS1	lincRNA	down	0.87718	1	0.87718
KANK2	protein_coding	down	MBNL1-AS1	lincRNA	down	0.871607	1	0.871607
EML1	protein_coding	down	MBNL1-AS1	lincRNA	down	0.870973	1	0.870973
ANK2	protein_coding	down	MBNL1-AS1	lincRNA	down	0.860202	1	0.860202
ANKS1B	protein_coding	down	MBNL1-AS1	lincRNA	down	0.860005	1	0.860005
MAPK4	protein_coding	down	MBNL1-AS1	lincRNA	down	0.857253	1	0.857253
DMD	protein_coding	down	MBNL1-AS1	lincRNA	down	0.85516	1	0.85516
KCNN3	protein_coding	down	MBNL1-AS1	lincRNA	down	0.853868	1	0.853868
LONRF2	protein_coding	down	MBNL1-AS1	lincRNA	down	0.853588	1	0.853588
ATP1A2	protein_coding	down	MBNL1-AS1	lincRNA	down	0.851262	1	0.851262
AL021395.1	lincRNA	down	MCHR2	protein_coding	down	0.88223	1	0.88223
AC046195.1	lincRNA	down	MCHR2	protein_coding	down	0.863861	1	0.863861
LINC01289	lincRNA	down	MCHR2	protein_coding	down	0.850808	1	0.850808
ATAD5	protein_coding	up	MCM8-AS1	lincRNA	up	0.863744	1	0.863744
KCTD4	protein_coding	down	MEG8	lincRNA	up	0.880222	1	0.880222
GRIK1	protein_coding	down	MEG8	lincRNA	up	0.864566	1	0.864566
GRIK5	protein_coding	down	MIR1-1HG-AS1	lincRNA	down	0.912313	1	0.912313
GNAO1	protein_coding	down	MIR1-1HG-AS1	lincRNA	down	0.908628	1	0.908628
KCNB1	protein_coding	down	MIR1-1HG-AS1	lincRNA	down	0.878444	1	0.878444
KCNMA1	protein_coding	down	MIR1-1HG-AS1	lincRNA	down	0.872872	1	0.872872
CPEB1	protein_coding	down	MIR1-1HG-AS1	lincRNA	down	0.859132	1	0.859132
GPM6A	protein_coding	down	MIR1-1HG-AS1	lincRNA	down	0.857453	1	0.857453
MAB21L2	protein_coding	down	MIR1-1HG-AS1	lincRNA	down	0.856556	1	0.856556
KANK2	protein_coding	down	MIR1-1HG-AS1	lincRNA	down	0.856353	1	0.856353
MAPK4	protein_coding	down	MIR1-1HG-AS1	lincRNA	down	0.854373	1	0.854373
HSPB8	protein_coding	down	MIR1-1HG-AS1	lincRNA	down	0.850157	1	0.850157
KCTD4	protein_coding	down	MIR133A1HG	lincRNA	down	0.948439	1	0.948439
GRIK1	protein_coding	down	MIR133A1HG	lincRNA	down	0.93095	1	0.93095
GLRA1	protein_coding	up	MIR133A1HG	lincRNA	down	0.869831	1	0.869831
GCM2	protein_coding	up	MIR133A1HG	lincRNA	down	0.86852	1	0.86852
KCNA4	protein_coding	down	MIR137HG	lincRNA	down	0.885941	1	0.885941
ARPP21	protein_coding	down	MIR137HG	lincRNA	down	0.88541	1	0.88541
DCAF12L1	protein_coding	down	MIR137HG	lincRNA	down	0.884272	1	0.884272
CALN1	protein_coding	down	MIR137HG	lincRNA	down	0.853218	1	0.853218
GRIK1	protein_coding	down	MIR181A1HG	lincRNA	up	0.898142	1	0.898142
FHL1	protein_coding	down	MIR497HG	lincRNA	down	0.89078	1	0.89078
CPEB1	protein_coding	down	MIR497HG	lincRNA	down	0.863831	1	0.863831
ADAMTSL3	protein_coding	down	MIR497HG	lincRNA	down	0.858418	1	0.858418
CFL2	protein_coding	down	MIR497HG	lincRNA	down	0.853965	1	0.853965
DPYSL5	protein_coding	down	MIR7-3HG	lincRNA	down	0.943385	1	0.943385
HCN4	protein_coding	down	MIR7-3HG	lincRNA	down	0.916635	1	0.916635
CUX2	protein_coding	down	MIR7-3HG	lincRNA	down	0.898677	1	0.898677
ATCAY	protein_coding	down	MIR7-3HG	lincRNA	down	0.864283	1	0.864283
KLHL1	protein_coding	down	MLIP-AS1	lincRNA	down	0.878148	1	0.878148
BOLL	protein_coding	up	MLIP-AS1	lincRNA	down	0.859706	1	0.859706
MIR7-3HG	lincRNA	down	MMD2	protein_coding	down	0.929904	1	0.929904
LINC01976	lincRNA	down	MMD2	protein_coding	down	0.870928	1	0.870928
LINC02078	lincRNA	down	MMD2	protein_coding	down	0.867997	1	0.867997
AC130650.2	lincRNA	up	MMS22L	protein_coding	up	0.885034	1	0.885034
AC131971.1	lincRNA	up	MMS22L	protein_coding	up	0.878295	1	0.878295
AL365356.1	lincRNA	up	MMS22L	protein_coding	up	0.873426	1	0.873426
AC087276.3	lincRNA	up	MMS22L	protein_coding	up	0.858768	1	0.858768
AC078962.3	lincRNA	up	MMS22L	protein_coding	up	0.858649	1	0.858649
AC078795.1	lincRNA	up	MMS22L	protein_coding	up	0.858586	1	0.858586
AL157938.3	lincRNA	up	MMS22L	protein_coding	up	0.857013	1	0.857013
AC008243.1	lincRNA	up	MMS22L	protein_coding	up	0.856502	1	0.856502
AC099811.4	lincRNA	up	MMS22L	protein_coding	up	0.851368	1	0.851368
AF127577.2	lincRNA	up	MMS22L	protein_coding	up	0.851363	1	0.851363
AC083806.2	lincRNA	up	MMS22L	protein_coding	up	0.851182	1	0.851182
AL118556.1	lincRNA	up	MMS22L	protein_coding	up	0.851079	1	0.851079
EIF1AX-AS1	lincRNA	up	MMS22L	protein_coding	up	0.85013	1	0.85013
AL110292.1	lincRNA	down	MORC1	protein_coding	down	0.855838	1	0.855838
AC109466.1	lincRNA	up	MORC1	protein_coding	down	0.854638	1	0.854638
AP001527.1	lincRNA	up	MORC1	protein_coding	down	0.853835	1	0.853835
AC096708.2	lincRNA	up	MORC1	protein_coding	down	0.852411	1	0.852411
AP000487.2	lincRNA	up	MORC1	protein_coding	down	0.85005	1	0.85005
GRIK1	protein_coding	down	MRTFA-AS1	lincRNA	up	0.850923	1	0.850923
MBNL1-AS1	lincRNA	down	MSRB3	protein_coding	down	0.924959	1	0.924959
AL356489.2	lincRNA	down	MSRB3	protein_coding	down	0.868903	1	0.868903
AL513217.1	lincRNA	down	MSRB3	protein_coding	down	0.861986	1	0.861986
AC036108.3	lincRNA	down	MSRB3	protein_coding	down	0.860632	1	0.860632
KCTD4	protein_coding	down	MTOR-AS1	lincRNA	up	0.85253	1	0.85253
AC002398.2	lincRNA	down	MYH11	protein_coding	down	0.911396	1	0.911396
AF001548.1	lincRNA	down	MYH11	protein_coding	down	0.904531	1	0.904531
AC009102.2	lincRNA	down	MYH11	protein_coding	down	0.894546	1	0.894546
MBNL1-AS1	lincRNA	down	MYH11	protein_coding	down	0.881719	1	0.881719
AL513217.1	lincRNA	down	MYH11	protein_coding	down	0.881167	1	0.881167
AC079313.2	lincRNA	down	MYH11	protein_coding	down	0.865279	1	0.865279
HAND2-AS1	lincRNA	down	MYH11	protein_coding	down	0.859594	1	0.859594
AC036108.3	lincRNA	down	MYH11	protein_coding	down	0.855247	1	0.855247
MBNL1-AS1	lincRNA	down	MYLK	protein_coding	down	0.933731	1	0.933731
AL513217.1	lincRNA	down	MYLK	protein_coding	down	0.90568	1	0.90568
AL355607.1	lincRNA	down	MYLK	protein_coding	down	0.902769	1	0.902769
AF001548.1	lincRNA	down	MYLK	protein_coding	down	0.891328	1	0.891328
AC010776.2	lincRNA	down	MYLK	protein_coding	down	0.887073	1	0.887073
AC002398.2	lincRNA	down	MYLK	protein_coding	down	0.886328	1	0.886328
AC079313.2	lincRNA	down	MYLK	protein_coding	down	0.884914	1	0.884914
AL356489.2	lincRNA	down	MYLK	protein_coding	down	0.879429	1	0.879429
AC036108.3	lincRNA	down	MYLK	protein_coding	down	0.866015	1	0.866015
AC011306.1	lincRNA	down	MYLK	protein_coding	down	0.860857	1	0.860857
HAND2-AS1	lincRNA	down	MYLK	protein_coding	down	0.851796	1	0.851796
GLRA1	protein_coding	up	MYLK-AS2	lincRNA	up	0.882169	1	0.882169
GRIK1	protein_coding	down	MYLK-AS2	lincRNA	up	0.873521	1	0.873521
AC009102.2	lincRNA	down	MYOCD	protein_coding	down	0.912485	1	0.912485
FENDRR	lincRNA	down	MYOCD	protein_coding	down	0.882415	1	0.882415
AL356489.2	lincRNA	down	MYOCD	protein_coding	down	0.880539	1	0.880539
MBNL1-AS1	lincRNA	down	MYOCD	protein_coding	down	0.878253	1	0.878253
AC036108.3	lincRNA	down	MYOCD	protein_coding	down	0.873481	1	0.873481
AC110491.1	lincRNA	down	MYOCD	protein_coding	down	0.870967	1	0.870967
HAND2-AS1	lincRNA	down	MYOCD	protein_coding	down	0.867581	1	0.867581
AC092720.2	lincRNA	down	MYT1L	protein_coding	down	0.889747	1	0.889747
KCTD4	protein_coding	down	NADK2-AS1	lincRNA	up	0.864898	1	0.864898
DCAF12L1	protein_coding	down	NAMA	lincRNA	up	0.895896	1	0.895896
KCNA4	protein_coding	down	NAMA	lincRNA	up	0.867683	1	0.867683
GLRA1	protein_coding	up	NAV2-AS2	lincRNA	up	0.852046	1	0.852046
CLRN1	protein_coding	up	NAV2-AS5	lincRNA	up	0.88434	1	0.88434
GRIK1	protein_coding	down	NBAT1	lincRNA	up	0.902864	1	0.902864
LPP	protein_coding	down	NBAT1	lincRNA	up	0.859038	1	0.859038
MIR7-3HG	lincRNA	down	NCAN	protein_coding	down	0.953566	1	0.953566
LINC01976	lincRNA	down	NCAN	protein_coding	down	0.899286	1	0.899286
LINC02078	lincRNA	down	NCAN	protein_coding	down	0.885946	1	0.885946
AC022893.2	lincRNA	down	NCAN	protein_coding	down	0.862718	1	0.862718
AC036108.3	lincRNA	down	NECAB1	protein_coding	down	0.898613	1	0.898613
MBNL1-AS1	lincRNA	down	NECAB1	protein_coding	down	0.897967	1	0.897967
LINC01829	lincRNA	down	NECAB1	protein_coding	down	0.874358	1	0.874358
AL356489.2	lincRNA	down	NECAB1	protein_coding	down	0.869136	1	0.869136
MBNL1-AS1	lincRNA	down	NEGR1	protein_coding	down	0.892013	1	0.892013
AC036108.3	lincRNA	down	NEGR1	protein_coding	down	0.876614	1	0.876614
FENDRR	lincRNA	down	NEGR1	protein_coding	down	0.875995	1	0.875995
HAND2-AS1	lincRNA	down	NEGR1	protein_coding	down	0.87507	1	0.87507
MIR497HG	lincRNA	down	NEGR1	protein_coding	down	0.871257	1	0.871257
AL356489.2	lincRNA	down	NEGR1	protein_coding	down	0.869011	1	0.869011
MIR7-3HG	lincRNA	down	NEUROD1	protein_coding	down	0.970901	1	0.970901
LINC01976	lincRNA	down	NEUROD1	protein_coding	down	0.892358	1	0.892358
LINC02078	lincRNA	down	NEUROD1	protein_coding	down	0.859581	1	0.859581
MBNL1-AS1	lincRNA	down	NLGN1	protein_coding	down	0.871622	1	0.871622
MIR1-1HG-AS1	lincRNA	down	NLGN1	protein_coding	down	0.860222	1	0.860222
AC036108.3	lincRNA	down	NLGN1	protein_coding	down	0.857901	1	0.857901
AL356489.2	lincRNA	down	NLGN1	protein_coding	down	0.85788	1	0.85788
AL162253.1	lincRNA	up	NPAS3	protein_coding	down	0.856877	1	0.856877
HAND2-AS1	lincRNA	down	NPTX1	protein_coding	down	0.88638	1	0.88638
AC009102.2	lincRNA	down	NPTX1	protein_coding	down	0.87567	1	0.87567
AC026688.2	lincRNA	down	NRG3	protein_coding	down	0.865732	1	0.865732
AC093390.1	lincRNA	down	NRG3	protein_coding	down	0.856524	1	0.856524
AC007920.1	lincRNA	down	NRG3	protein_coding	down	0.856251	1	0.856251
AQP4-AS1	lincRNA	down	NRG3	protein_coding	down	0.851494	1	0.851494
MIR137HG	lincRNA	down	NRG3	protein_coding	down	0.850841	1	0.850841
GRIK1	protein_coding	down	NUCB1-AS1	lincRNA	up	0.850601	1	0.850601
KCTD4	protein_coding	down	OPA1-AS1	lincRNA	up	0.954077	1	0.954077
GCM2	protein_coding	up	OPA1-AS1	lincRNA	up	0.896896	1	0.896896
GRIK1	protein_coding	down	OPA1-AS1	lincRNA	up	0.882358	1	0.882358
AL008638.6	lincRNA	up	OTP	protein_coding	up	0.883303	1	0.883303
AC139099.2	lincRNA	down	OTP	protein_coding	up	0.878416	1	0.878416
AP004147.1	lincRNA	up	OTP	protein_coding	up	0.872632	1	0.872632
LINC01532	lincRNA	down	OTP	protein_coding	up	0.871212	1	0.871212
AC016705.1	lincRNA	up	OTP	protein_coding	up	0.867936	1	0.867936
LINC02554	lincRNA	down	OTP	protein_coding	up	0.867199	1	0.867199
LINC01391	lincRNA	up	OTP	protein_coding	up	0.864947	1	0.864947
AC004835.1	lincRNA	up	OTP	protein_coding	up	0.862779	1	0.862779
LINC02547	lincRNA	up	OTP	protein_coding	up	0.857231	1	0.857231
AC073934.1	lincRNA	up	OTP	protein_coding	up	0.855745	1	0.855745
AC018682.2	lincRNA	up	OTP	protein_coding	up	0.854223	1	0.854223
AL117328.2	lincRNA	up	OTP	protein_coding	up	0.851234	1	0.851234
AP002784.1	lincRNA	up	OTP	protein_coding	up	0.850073	1	0.850073
MBNL1-AS1	lincRNA	down	PALLD	protein_coding	down	0.869862	1	0.869862
AP002518.1	lincRNA	up	PALM2	protein_coding	up	0.969064	1	0.969064
AL023584.2	lincRNA	up	PALM2	protein_coding	up	0.964961	1	0.964961
KCNMA1-AS3	lincRNA	up	PALM2	protein_coding	up	0.962235	1	0.962235
AF178030.1	lincRNA	up	PALM2	protein_coding	up	0.961722	1	0.961722
AC022973.4	lincRNA	up	PALM2	protein_coding	up	0.95555	1	0.95555
AC022973.3	lincRNA	up	PALM2	protein_coding	up	0.954616	1	0.954616
AC136424.2	lincRNA	up	PALM2	protein_coding	up	0.954211	1	0.954211
AL162253.1	lincRNA	up	PALM2	protein_coding	up	0.950272	1	0.950272
AC020611.2	lincRNA	up	PALM2	protein_coding	up	0.948773	1	0.948773
AC006460.1	lincRNA	up	PALM2	protein_coding	up	0.948265	1	0.948265
AC021739.4	lincRNA	up	PALM2	protein_coding	up	0.946207	1	0.946207
AC099550.1	lincRNA	up	PALM2	protein_coding	up	0.945869	1	0.945869
AC044781.1	lincRNA	up	PALM2	protein_coding	up	0.944299	1	0.944299
AL645504.1	lincRNA	up	PALM2	protein_coding	up	0.9439	1	0.9439
AL360091.3	lincRNA	up	PALM2	protein_coding	up	0.94106	1	0.94106
ITGB5-AS1	lincRNA	up	PALM2	protein_coding	up	0.940163	1	0.940163
AC008534.1	lincRNA	up	PALM2	protein_coding	up	0.937552	1	0.937552
AC022778.1	lincRNA	up	PALM2	protein_coding	up	0.937048	1	0.937048
AP003086.3	lincRNA	up	PALM2	protein_coding	up	0.936367	1	0.936367
AL121957.1	lincRNA	up	PALM2	protein_coding	up	0.934666	1	0.934666
AC010401.1	lincRNA	up	PALM2	protein_coding	up	0.934521	1	0.934521
AC044840.1	lincRNA	up	PALM2	protein_coding	up	0.933347	1	0.933347
AP003696.1	lincRNA	up	PALM2	protein_coding	up	0.932445	1	0.932445
AC009542.1	lincRNA	up	PALM2	protein_coding	up	0.929778	1	0.929778
AC020661.3	lincRNA	up	PALM2	protein_coding	up	0.928407	1	0.928407
AP000487.2	lincRNA	up	PALM2	protein_coding	up	0.928349	1	0.928349
LINC00862	lincRNA	up	PALM2	protein_coding	up	0.928279	1	0.928279
AC100800.1	lincRNA	up	PALM2	protein_coding	up	0.927539	1	0.927539
HMGA2-AS1	lincRNA	up	PALM2	protein_coding	up	0.926552	1	0.926552
AC020661.2	lincRNA	up	PALM2	protein_coding	up	0.924034	1	0.924034
AC026782.2	lincRNA	up	PALM2	protein_coding	up	0.923805	1	0.923805
AC022540.1	lincRNA	up	PALM2	protein_coding	up	0.923387	1	0.923387
COL5A1-AS1	lincRNA	up	PALM2	protein_coding	up	0.920177	1	0.920177
ARNTL2-AS1	lincRNA	up	PALM2	protein_coding	up	0.920075	1	0.920075
AC012404.2	lincRNA	up	PALM2	protein_coding	up	0.919338	1	0.919338
AC072022.1	lincRNA	up	PALM2	protein_coding	up	0.919261	1	0.919261
AC005828.1	lincRNA	up	PALM2	protein_coding	up	0.917693	1	0.917693
INHBA-AS1	lincRNA	up	PALM2	protein_coding	up	0.917679	1	0.917679
HIF1A-AS2	lincRNA	up	PALM2	protein_coding	up	0.913879	1	0.913879
LIPC-AS1	lincRNA	up	PALM2	protein_coding	up	0.913632	1	0.913632
MYLK-AS2	lincRNA	up	PALM2	protein_coding	up	0.912551	1	0.912551
AC008121.2	lincRNA	up	PALM2	protein_coding	up	0.912234	1	0.912234
AC007298.1	lincRNA	up	PALM2	protein_coding	up	0.911339	1	0.911339
AC096708.2	lincRNA	up	PALM2	protein_coding	up	0.911231	1	0.911231
AC016910.1	lincRNA	up	PALM2	protein_coding	up	0.908813	1	0.908813
DOCK9-AS1	lincRNA	up	PALM2	protein_coding	up	0.907994	1	0.907994
AL022329.1	lincRNA	up	PALM2	protein_coding	up	0.907184	1	0.907184
AC011595.1	lincRNA	up	PALM2	protein_coding	up	0.905593	1	0.905593
MIR133A1HG	lincRNA	down	PALM2	protein_coding	up	0.905088	1	0.905088
FBXW7-AS1	lincRNA	up	PALM2	protein_coding	up	0.904872	1	0.904872
AC016866.2	lincRNA	up	PALM2	protein_coding	up	0.904147	1	0.904147
AL445248.1	lincRNA	up	PALM2	protein_coding	up	0.903906	1	0.903906
AC020913.3	lincRNA	up	PALM2	protein_coding	up	0.901904	1	0.901904
AL158166.2	lincRNA	up	PALM2	protein_coding	up	0.901061	1	0.901061
AP003498.1	lincRNA	up	PALM2	protein_coding	up	0.900245	1	0.900245
MEG8	lincRNA	up	PALM2	protein_coding	up	0.899223	1	0.899223
AC022395.1	lincRNA	up	PALM2	protein_coding	up	0.896517	1	0.896517
AP003555.1	lincRNA	up	PALM2	protein_coding	up	0.896428	1	0.896428
AC027808.1	lincRNA	up	PALM2	protein_coding	up	0.895251	1	0.895251
AC083806.2	lincRNA	up	PALM2	protein_coding	up	0.8943	1	0.8943
AL080317.2	lincRNA	up	PALM2	protein_coding	up	0.893396	1	0.893396
AC069542.1	lincRNA	up	PALM2	protein_coding	up	0.892897	1	0.892897
AC027228.1	lincRNA	up	PALM2	protein_coding	up	0.892142	1	0.892142
AL049820.1	lincRNA	up	PALM2	protein_coding	up	0.89185	1	0.89185
MRTFA-AS1	lincRNA	up	PALM2	protein_coding	up	0.89097	1	0.89097
AL139095.4	lincRNA	up	PALM2	protein_coding	up	0.890448	1	0.890448
AC004466.3	lincRNA	up	PALM2	protein_coding	up	0.889608	1	0.889608
LINC01050	lincRNA	up	PALM2	protein_coding	up	0.88929	1	0.88929
AL359693.1	lincRNA	up	PALM2	protein_coding	up	0.889188	1	0.889188
LPP-AS1	lincRNA	up	PALM2	protein_coding	up	0.889151	1	0.889151
AC007314.1	lincRNA	up	PALM2	protein_coding	up	0.888846	1	0.888846
DPYD-AS1	lincRNA	up	PALM2	protein_coding	up	0.888588	1	0.888588
AC002064.2	lincRNA	up	PALM2	protein_coding	up	0.887767	1	0.887767
AC026894.1	lincRNA	up	PALM2	protein_coding	up	0.886871	1	0.886871
AC090673.1	lincRNA	up	PALM2	protein_coding	up	0.886354	1	0.886354
AC073569.1	lincRNA	up	PALM2	protein_coding	up	0.885658	1	0.885658
LINC01338	lincRNA	up	PALM2	protein_coding	up	0.885266	1	0.885266
AC103739.2	lincRNA	up	PALM2	protein_coding	up	0.885044	1	0.885044
AC003986.2	lincRNA	up	PALM2	protein_coding	up	0.884971	1	0.884971
AC018878.1	lincRNA	up	PALM2	protein_coding	up	0.882595	1	0.882595
FO680682.1	lincRNA	up	PALM2	protein_coding	up	0.882298	1	0.882298
AC025030.2	lincRNA	up	PALM2	protein_coding	up	0.882231	1	0.882231
AC243772.2	lincRNA	up	PALM2	protein_coding	up	0.881823	1	0.881823
AC024475.1	lincRNA	up	PALM2	protein_coding	up	0.881223	1	0.881223
AC008121.3	lincRNA	up	PALM2	protein_coding	up	0.880654	1	0.880654
LINC02584	lincRNA	up	PALM2	protein_coding	up	0.880099	1	0.880099
CARNMT1-AS1	lincRNA	up	PALM2	protein_coding	up	0.88006	1	0.88006
AC006270.1	lincRNA	up	PALM2	protein_coding	up	0.879559	1	0.879559
AC110792.2	lincRNA	up	PALM2	protein_coding	up	0.879408	1	0.879408
CFAP44-AS1	lincRNA	up	PALM2	protein_coding	up	0.879037	1	0.879037
AC018682.1	lincRNA	up	PALM2	protein_coding	up	0.877296	1	0.877296
AC087286.1	lincRNA	up	PALM2	protein_coding	up	0.876537	1	0.876537
AC007496.1	lincRNA	up	PALM2	protein_coding	up	0.876341	1	0.876341
AL031770.1	lincRNA	up	PALM2	protein_coding	up	0.875922	1	0.875922
AL513188.1	lincRNA	up	PALM2	protein_coding	up	0.875635	1	0.875635
AC133644.2	lincRNA	down	PALM2	protein_coding	up	0.873635	1	0.873635
AC007731.3	lincRNA	up	PALM2	protein_coding	up	0.872576	1	0.872576
AC018462.1	lincRNA	up	PALM2	protein_coding	up	0.872573	1	0.872573
AC092839.2	lincRNA	up	PALM2	protein_coding	up	0.872271	1	0.872271
LINC01796	lincRNA	up	PALM2	protein_coding	up	0.872067	1	0.872067
AC026470.3	lincRNA	up	PALM2	protein_coding	up	0.871185	1	0.871185
AC104316.1	lincRNA	up	PALM2	protein_coding	up	0.871124	1	0.871124
IGF2BP2-AS1	lincRNA	up	PALM2	protein_coding	up	0.870891	1	0.870891
AP001381.1	lincRNA	up	PALM2	protein_coding	up	0.870833	1	0.870833
MTOR-AS1	lincRNA	up	PALM2	protein_coding	up	0.870793	1	0.870793
AL117190.1	lincRNA	up	PALM2	protein_coding	up	0.87042	1	0.87042
AP000763.3	lincRNA	up	PALM2	protein_coding	up	0.870279	1	0.870279
DOCK4-AS1	lincRNA	up	PALM2	protein_coding	up	0.868917	1	0.868917
OPA1-AS1	lincRNA	up	PALM2	protein_coding	up	0.868732	1	0.868732
AC100763.1	lincRNA	up	PALM2	protein_coding	up	0.867802	1	0.867802
AC010285.1	lincRNA	up	PALM2	protein_coding	up	0.866917	1	0.866917
AC108063.1	lincRNA	up	PALM2	protein_coding	up	0.866532	1	0.866532
GK-AS1	lincRNA	up	PALM2	protein_coding	up	0.866441	1	0.866441
AC104462.1	lincRNA	up	PALM2	protein_coding	up	0.865984	1	0.865984
AC007750.1	lincRNA	up	PALM2	protein_coding	up	0.864544	1	0.864544
LINC01429	lincRNA	up	PALM2	protein_coding	up	0.864108	1	0.864108
AC055764.1	lincRNA	up	PALM2	protein_coding	up	0.863486	1	0.863486
AC068389.3	lincRNA	up	PALM2	protein_coding	up	0.863228	1	0.863228
AC026355.2	lincRNA	up	PALM2	protein_coding	up	0.86315	1	0.86315
LINC00624	lincRNA	up	PALM2	protein_coding	up	0.862723	1	0.862723
AL160163.1	lincRNA	up	PALM2	protein_coding	up	0.862707	1	0.862707
AC019270.1	lincRNA	up	PALM2	protein_coding	up	0.862349	1	0.862349
CD44-AS1	lincRNA	up	PALM2	protein_coding	up	0.862032	1	0.862032
AL161757.2	lincRNA	up	PALM2	protein_coding	up	0.860224	1	0.860224
AC087276.3	lincRNA	up	PALM2	protein_coding	up	0.860042	1	0.860042
AL078604.2	lincRNA	up	PALM2	protein_coding	up	0.860017	1	0.860017
AC005757.1	lincRNA	up	PALM2	protein_coding	up	0.85997	1	0.85997
AC092794.2	lincRNA	up	PALM2	protein_coding	up	0.859717	1	0.859717
AP002907.1	lincRNA	up	PALM2	protein_coding	up	0.85757	1	0.85757
LUCAT1	lincRNA	up	PALM2	protein_coding	up	0.856556	1	0.856556
AP001527.1	lincRNA	up	PALM2	protein_coding	up	0.855654	1	0.855654
LINC02656	lincRNA	up	PALM2	protein_coding	up	0.855287	1	0.855287
AL022097.1	lincRNA	up	PALM2	protein_coding	up	0.855181	1	0.855181
AC012358.1	lincRNA	up	PALM2	protein_coding	up	0.85421	1	0.85421
BACH1-IT2	lincRNA	up	PALM2	protein_coding	up	0.853986	1	0.853986
AC018557.2	lincRNA	up	PALM2	protein_coding	up	0.853671	1	0.853671
AC048341.2	lincRNA	up	PALM2	protein_coding	up	0.853586	1	0.853586
AC131182.1	lincRNA	up	PALM2	protein_coding	up	0.853374	1	0.853374
AL590723.1	lincRNA	up	PALM2	protein_coding	up	0.853052	1	0.853052
AL365356.1	lincRNA	up	PALM2	protein_coding	up	0.852507	1	0.852507
AL357568.1	lincRNA	up	PALM2	protein_coding	up	0.85197	1	0.85197
AC108463.3	lincRNA	up	PALM2	protein_coding	up	0.851888	1	0.851888
AC087286.2	lincRNA	up	PALM2	protein_coding	up	0.851451	1	0.851451
AC002064.1	lincRNA	up	PALM2	protein_coding	up	0.851348	1	0.851348
AC009563.1	lincRNA	up	PALM2	protein_coding	up	0.851204	1	0.851204
AC011352.1	lincRNA	up	PALM2	protein_coding	up	0.850904	1	0.850904
AC078962.3	lincRNA	up	PALM2	protein_coding	up	0.850458	1	0.850458
PALM2	protein_coding	up	PAPPA-AS2	lincRNA	up	0.924009	1	0.924009
DMP1	protein_coding	up	PAPPA-AS2	lincRNA	up	0.893185	1	0.893185
GLRA1	protein_coding	up	PAPPA-AS2	lincRNA	up	0.854759	1	0.854759
LINC00384	lincRNA	up	PCDH11X	protein_coding	down	0.854154	1	0.854154
AC008938.1	lincRNA	up	PCDH15	protein_coding	down	0.955864	1	0.955864
AC106895.2	lincRNA	down	PCDH15	protein_coding	down	0.916406	1	0.916406
CPEB1-AS1	lincRNA	down	PCDH15	protein_coding	down	0.89753	1	0.89753
LINC02141	lincRNA	up	PCDH15	protein_coding	down	0.895656	1	0.895656
AC093390.1	lincRNA	down	PCDH15	protein_coding	down	0.884829	1	0.884829
AC135012.1	lincRNA	up	PCDH15	protein_coding	down	0.87732	1	0.87732
NAV2-AS5	lincRNA	up	PCDH15	protein_coding	down	0.875842	1	0.875842
CLSTN2-AS1	lincRNA	up	PCDH15	protein_coding	down	0.871967	1	0.871967
LY86-AS1	lincRNA	down	PCDH15	protein_coding	down	0.869291	1	0.869291
LINC02181	lincRNA	up	PCDH15	protein_coding	down	0.866829	1	0.866829
AL606760.3	lincRNA	up	PCDH15	protein_coding	down	0.861577	1	0.861577
DDR1-DT	lincRNA	up	PCDH15	protein_coding	down	0.856095	1	0.856095
LINC00671	lincRNA	down	PCDH15	protein_coding	down	0.855927	1	0.855927
AL110292.1	lincRNA	down	PCDH15	protein_coding	down	0.854259	1	0.854259
AC012409.3	lincRNA	down	PCDH15	protein_coding	down	0.852301	1	0.852301
MIR497HG	lincRNA	down	PDE2A	protein_coding	down	0.875592	1	0.875592
KCNA4	protein_coding	down	PGM5P4-AS1	lincRNA	down	0.912435	1	0.912435
DCAF12L1	protein_coding	down	PGM5P4-AS1	lincRNA	down	0.89195	1	0.89195
GAL3ST3	protein_coding	down	PGM5P4-AS1	lincRNA	down	0.882235	1	0.882235
GSG1L	protein_coding	down	PGM5P4-AS1	lincRNA	down	0.873518	1	0.873518
CELA1	protein_coding	down	PGM5P4-AS1	lincRNA	down	0.868346	1	0.868346
LHX1-DT	lincRNA	up	PHF21B	protein_coding	down	0.885067	1	0.885067
AC092720.2	lincRNA	down	PHF21B	protein_coding	down	0.876931	1	0.876931
AC016027.1	lincRNA	down	PHLPP2	protein_coding	down	0.852284	1	0.852284
PALM2	protein_coding	up	PKIA-AS1	lincRNA	up	0.887288	1	0.887288
KCTD4	protein_coding	down	PLCG1-AS1	lincRNA	up	0.917845	1	0.917845
PALM2	protein_coding	up	PLCG1-AS1	lincRNA	up	0.899463	1	0.899463
GRIK1	protein_coding	down	PLCG1-AS1	lincRNA	up	0.885519	1	0.885519
GLRA1	protein_coding	up	PLCG1-AS1	lincRNA	up	0.866746	1	0.866746
HAND2-AS1	lincRNA	down	PLP1	protein_coding	down	0.855781	1	0.855781
MBNL1-AS1	lincRNA	down	PPP1R12B	protein_coding	down	0.95499	1	0.95499
AC036108.3	lincRNA	down	PPP1R12B	protein_coding	down	0.928092	1	0.928092
AL356489.2	lincRNA	down	PPP1R12B	protein_coding	down	0.911381	1	0.911381
AC009102.2	lincRNA	down	PPP1R12B	protein_coding	down	0.89481	1	0.89481
AF001548.1	lincRNA	down	PPP1R12B	protein_coding	down	0.868485	1	0.868485
AL513217.1	lincRNA	down	PPP1R12B	protein_coding	down	0.865747	1	0.865747
FENDRR	lincRNA	down	PPP1R12B	protein_coding	down	0.857263	1	0.857263
AC002398.2	lincRNA	down	PPP1R12B	protein_coding	down	0.852945	1	0.852945
HAND2-AS1	lincRNA	down	PPP1R12B	protein_coding	down	0.852392	1	0.852392
PALM2	protein_coding	up	PRICKLE2-AS3	lincRNA	up	0.94003	1	0.94003
DMP1	protein_coding	up	PRICKLE2-AS3	lincRNA	up	0.9113	1	0.9113
GLRA1	protein_coding	up	PRICKLE2-AS3	lincRNA	up	0.851403	1	0.851403
HAND2-AS1	lincRNA	down	PRIMA1	protein_coding	down	0.86765	1	0.86765
GLRA1	protein_coding	up	PRKG1-AS1	lincRNA	up	0.901514	1	0.901514
PALM2	protein_coding	up	PRKG1-AS1	lincRNA	up	0.889422	1	0.889422
GRIK1	protein_coding	down	PRKG1-AS1	lincRNA	up	0.882933	1	0.882933
KCTD4	protein_coding	down	PRKG1-AS1	lincRNA	up	0.8757	1	0.8757
AC073934.1	lincRNA	up	PRRG3	protein_coding	down	0.964022	1	0.964022
AC016705.1	lincRNA	up	PRRG3	protein_coding	down	0.963352	1	0.963352
AC139099.2	lincRNA	down	PRRG3	protein_coding	down	0.962888	1	0.962888
LINC02554	lincRNA	down	PRRG3	protein_coding	down	0.949399	1	0.949399
AC004835.1	lincRNA	up	PRRG3	protein_coding	down	0.946102	1	0.946102
GPRACR	lincRNA	down	PRRG3	protein_coding	down	0.945281	1	0.945281
AC018682.2	lincRNA	up	PRRG3	protein_coding	down	0.941688	1	0.941688
AL008638.6	lincRNA	up	PRRG3	protein_coding	down	0.940454	1	0.940454
AC145207.7	lincRNA	up	PRRG3	protein_coding	down	0.939911	1	0.939911
DBET	lincRNA	up	PRRG3	protein_coding	down	0.937758	1	0.937758
AC126614.1	lincRNA	up	PRRG3	protein_coding	down	0.93591	1	0.93591
AP002784.1	lincRNA	up	PRRG3	protein_coding	down	0.933563	1	0.933563
AC026688.2	lincRNA	down	PRRG3	protein_coding	down	0.932162	1	0.932162
AL355390.1	lincRNA	up	PRRG3	protein_coding	down	0.927042	1	0.927042
PGM5P4-AS1	lincRNA	down	PRRG3	protein_coding	down	0.926741	1	0.926741
AC084064.1	lincRNA	down	PRRG3	protein_coding	down	0.924719	1	0.924719
AC109479.3	lincRNA	up	PRRG3	protein_coding	down	0.920439	1	0.920439
AC023906.2	lincRNA	down	PRRG3	protein_coding	down	0.919909	1	0.919909
AC026469.1	lincRNA	down	PRRG3	protein_coding	down	0.919503	1	0.919503
AC084346.1	lincRNA	up	PRRG3	protein_coding	down	0.918113	1	0.918113
AL117328.2	lincRNA	up	PRRG3	protein_coding	down	0.912794	1	0.912794
LINC01907	lincRNA	down	PRRG3	protein_coding	down	0.9107	1	0.9107
LINC01391	lincRNA	up	PRRG3	protein_coding	down	0.909875	1	0.909875
AP004147.1	lincRNA	up	PRRG3	protein_coding	down	0.909541	1	0.909541
AL096828.1	lincRNA	up	PRRG3	protein_coding	down	0.906695	1	0.906695
AP003064.2	lincRNA	down	PRRG3	protein_coding	down	0.904917	1	0.904917
AL512604.3	lincRNA	up	PRRG3	protein_coding	down	0.900982	1	0.900982
AC087855.2	lincRNA	down	PRRG3	protein_coding	down	0.900622	1	0.900622
LINC01532	lincRNA	down	PRRG3	protein_coding	down	0.899373	1	0.899373
AL772337.2	lincRNA	down	PRRG3	protein_coding	down	0.895993	1	0.895993
LINC01701	lincRNA	up	PRRG3	protein_coding	down	0.890375	1	0.890375
AC245884.1	lincRNA	up	PRRG3	protein_coding	down	0.890365	1	0.890365
AC093642.1	lincRNA	down	PRRG3	protein_coding	down	0.889367	1	0.889367
LINC02348	lincRNA	up	PRRG3	protein_coding	down	0.888455	1	0.888455
AC243965.1	lincRNA	up	PRRG3	protein_coding	down	0.888254	1	0.888254
AC122719.2	lincRNA	up	PRRG3	protein_coding	down	0.885933	1	0.885933
LINC02547	lincRNA	up	PRRG3	protein_coding	down	0.881078	1	0.881078
C12orf80	lincRNA	up	PRRG3	protein_coding	down	0.880996	1	0.880996
LINC01257	lincRNA	up	PRRG3	protein_coding	down	0.879261	1	0.879261
LINC00163	lincRNA	down	PRRG3	protein_coding	down	0.878712	1	0.878712
AC010907.2	lincRNA	up	PRRG3	protein_coding	down	0.877147	1	0.877147
AL157400.1	lincRNA	up	PRRG3	protein_coding	down	0.876601	1	0.876601
AC068858.1	lincRNA	up	PRRG3	protein_coding	down	0.875596	1	0.875596
AC090844.3	lincRNA	up	PRRG3	protein_coding	down	0.872661	1	0.872661
AQP4-AS1	lincRNA	down	PRRG3	protein_coding	down	0.872616	1	0.872616
AL138767.1	lincRNA	up	PRRG3	protein_coding	down	0.871904	1	0.871904
AP000265.1	lincRNA	up	PRRG3	protein_coding	down	0.868557	1	0.868557
AC037441.1	lincRNA	up	PRRG3	protein_coding	down	0.865613	1	0.865613
AP002409.1	lincRNA	down	PRRG3	protein_coding	down	0.860839	1	0.860839
AC245052.1	lincRNA	up	PRRG3	protein_coding	down	0.859115	1	0.859115
ANK3-DT	lincRNA	up	PRRG3	protein_coding	down	0.858365	1	0.858365
NAMA	lincRNA	up	PRRG3	protein_coding	down	0.857599	1	0.857599
LINC01747	lincRNA	up	PRRG3	protein_coding	down	0.857297	1	0.857297
AC099684.1	lincRNA	up	PRRG3	protein_coding	down	0.856997	1	0.856997
AC093496.1	lincRNA	up	PRRG3	protein_coding	down	0.856475	1	0.856475
AL162457.2	lincRNA	up	PRRG3	protein_coding	down	0.853418	1	0.853418
HMMR-AS1	lincRNA	up	PRRG3	protein_coding	down	0.851086	1	0.851086
HAND2-AS1	lincRNA	down	PSD	protein_coding	down	0.887358	1	0.887358
AL513217.1	lincRNA	down	PSD	protein_coding	down	0.88506	1	0.88506
AC010776.2	lincRNA	down	PSD	protein_coding	down	0.884343	1	0.884343
AC002398.2	lincRNA	down	PSD	protein_coding	down	0.873562	1	0.873562
AL355607.1	lincRNA	down	PSD	protein_coding	down	0.87169	1	0.87169
MBNL1-AS1	lincRNA	down	PSD	protein_coding	down	0.867973	1	0.867973
MIR497HG	lincRNA	down	PSD	protein_coding	down	0.855229	1	0.855229
KCTD4	protein_coding	down	PSPC1-AS2	lincRNA	up	0.885883	1	0.885883
GCM2	protein_coding	up	PSPC1-AS2	lincRNA	up	0.880244	1	0.880244
PALM2	protein_coding	up	PSPC1-AS2	lincRNA	up	0.851325	1	0.851325
ARPP21	protein_coding	down	PTCHD1-AS	lincRNA	down	0.87875	1	0.87875
KLHL1	protein_coding	down	PTCHD1-AS	lincRNA	down	0.872215	1	0.872215
DCAF12L1	protein_coding	down	PTCHD1-AS	lincRNA	down	0.85979	1	0.85979
HAND2-AS1	lincRNA	down	PTGS1	protein_coding	down	0.869836	1	0.869836
AC009102.2	lincRNA	down	PTGS1	protein_coding	down	0.867104	1	0.867104
AF001548.1	lincRNA	down	PTGS1	protein_coding	down	0.860397	1	0.860397
AC002398.2	lincRNA	down	PTGS1	protein_coding	down	0.853184	1	0.853184
PALM2	protein_coding	up	PTPRJ-AS1	lincRNA	up	0.851084	1	0.851084
AL356753.1	lincRNA	up	PXT1	protein_coding	up	0.935344	1	0.935344
AC005304.2	lincRNA	up	PXT1	protein_coding	up	0.916976	1	0.916976
C7orf69	lincRNA	up	PXT1	protein_coding	up	0.877993	1	0.877993
AC018761.3	lincRNA	up	PXT1	protein_coding	up	0.877471	1	0.877471
AC005264.1	lincRNA	up	PXT1	protein_coding	up	0.875807	1	0.875807
NAMA	lincRNA	up	PXT1	protein_coding	up	0.860057	1	0.860057
AL032819.1	lincRNA	up	PXT1	protein_coding	up	0.856652	1	0.856652
AL022322.2	lincRNA	up	PXT1	protein_coding	up	0.8552	1	0.8552
AC135012.1	lincRNA	up	PXT1	protein_coding	up	0.852526	1	0.852526
GRIK1	protein_coding	down	RAPGEF4-AS1	lincRNA	up	0.891152	1	0.891152
GLRA1	protein_coding	up	RAPGEF4-AS1	lincRNA	up	0.880432	1	0.880432
KCTD4	protein_coding	down	RAPGEF4-AS1	lincRNA	up	0.863762	1	0.863762
PALM2	protein_coding	up	RAPGEF4-AS1	lincRNA	up	0.863487	1	0.863487
GRM5	protein_coding	up	RAPGEF4-AS1	lincRNA	up	0.857286	1	0.857286
FENDRR	lincRNA	down	RASL12	protein_coding	down	0.860051	1	0.860051
AF001548.1	lincRNA	down	RBFOX3	protein_coding	down	0.891686	1	0.891686
AC079313.2	lincRNA	down	RBFOX3	protein_coding	down	0.865967	1	0.865967
AC002398.2	lincRNA	down	RBFOX3	protein_coding	down	0.854815	1	0.854815
ADAMTS9-AS2	lincRNA	down	RBMS3	protein_coding	down	0.919847	1	0.919847
AC092376.2	lincRNA	down	RBMS3	protein_coding	down	0.903165	1	0.903165
LINC01266	lincRNA	down	RBMS3	protein_coding	down	0.877932	1	0.877932
LINC01798	lincRNA	down	RBMS3	protein_coding	down	0.863333	1	0.863333
AC104984.6	lincRNA	up	RBMS3	protein_coding	down	0.860249	1	0.860249
AL357078.3	lincRNA	up	RBMS3	protein_coding	down	0.850499	1	0.850499
GRIK1	protein_coding	down	RBMS3-AS2	lincRNA	up	0.895086	1	0.895086
GLRA1	protein_coding	up	RBMS3-AS2	lincRNA	up	0.890965	1	0.890965
RBMS3	protein_coding	down	RBMS3-AS2	lincRNA	up	0.853416	1	0.853416
KCNAB1	protein_coding	down	RBMS3-AS3	lincRNA	down	0.871107	1	0.871107
RBMS3	protein_coding	down	RBMS3-AS3	lincRNA	down	0.868252	1	0.868252
FIGN	protein_coding	down	RBMS3-AS3	lincRNA	down	0.861977	1	0.861977
LPP	protein_coding	down	RBMS3-AS3	lincRNA	down	0.852549	1	0.852549
MBNL1-AS1	lincRNA	down	RBPMS2	protein_coding	down	0.910796	1	0.910796
AL513217.1	lincRNA	down	RBPMS2	protein_coding	down	0.900271	1	0.900271
AC002398.2	lincRNA	down	RBPMS2	protein_coding	down	0.889152	1	0.889152
HAND2-AS1	lincRNA	down	RBPMS2	protein_coding	down	0.887915	1	0.887915
AC010776.2	lincRNA	down	RBPMS2	protein_coding	down	0.886759	1	0.886759
MIR1-1HG-AS1	lincRNA	down	RBPMS2	protein_coding	down	0.874006	1	0.874006
FENDRR	lincRNA	down	RBPMS2	protein_coding	down	0.869916	1	0.869916
AL356489.2	lincRNA	down	RBPMS2	protein_coding	down	0.868384	1	0.868384
AL355607.1	lincRNA	down	RBPMS2	protein_coding	down	0.866752	1	0.866752
AF001548.1	lincRNA	down	RBPMS2	protein_coding	down	0.86476	1	0.86476
AC009102.2	lincRNA	down	RBPMS2	protein_coding	down	0.855742	1	0.855742
MIR497HG	lincRNA	down	RBPMS2	protein_coding	down	0.853631	1	0.853631
AC011306.1	lincRNA	down	RBPMS2	protein_coding	down	0.853617	1	0.853617
PALM2	protein_coding	up	RDH10-AS1	lincRNA	up	0.92698	1	0.92698
GLRA1	protein_coding	up	RDH10-AS1	lincRNA	up	0.892459	1	0.892459
KCTD4	protein_coding	down	RDH10-AS1	lincRNA	up	0.871526	1	0.871526
MIR1-1HG-AS1	lincRNA	down	REEP2	protein_coding	down	0.896412	1	0.896412
AL513217.1	lincRNA	down	REEP2	protein_coding	down	0.85909	1	0.85909
AC002398.2	lincRNA	down	REEP2	protein_coding	down	0.855345	1	0.855345
LINC00276	lincRNA	up	RFX4	protein_coding	up	0.875467	1	0.875467
AL021395.1	lincRNA	down	RFX4	protein_coding	up	0.867814	1	0.867814
LINC01483	lincRNA	up	RFX4	protein_coding	up	0.855449	1	0.855449
GCM2	protein_coding	up	RNASEH2B-AS1	lincRNA	up	0.94066	1	0.94066
GRIK1	protein_coding	down	RNASEH2B-AS1	lincRNA	up	0.881762	1	0.881762
MBNL1-AS1	lincRNA	down	RNF150	protein_coding	down	0.930218	1	0.930218
AC036108.3	lincRNA	down	RNF150	protein_coding	down	0.918899	1	0.918899
AC009102.2	lincRNA	down	RNF150	protein_coding	down	0.913974	1	0.913974
AL356489.2	lincRNA	down	RNF150	protein_coding	down	0.900709	1	0.900709
HAND2-AS1	lincRNA	down	RNF150	protein_coding	down	0.900384	1	0.900384
AF001548.1	lincRNA	down	RNF150	protein_coding	down	0.88196	1	0.88196
AC110491.1	lincRNA	down	RNF150	protein_coding	down	0.86266	1	0.86266
AC011306.1	lincRNA	down	RNF150	protein_coding	down	0.86265	1	0.86265
GRIA2	protein_coding	down	RNF219-AS1	lincRNA	up	0.908364	1	0.908364
PCDH15	protein_coding	down	RNF219-AS1	lincRNA	up	0.875435	1	0.875435
CLRN1	protein_coding	up	RNF219-AS1	lincRNA	up	0.862663	1	0.862663
ADAMTS9-AS2	lincRNA	down	RUNX1T1	protein_coding	down	0.890892	1	0.890892
BNC2-AS1	lincRNA	down	RUNX1T1	protein_coding	down	0.882088	1	0.882088
AC103853.1	lincRNA	up	RUNX1T1	protein_coding	down	0.872323	1	0.872323
AC092376.2	lincRNA	down	RUNX1T1	protein_coding	down	0.859419	1	0.859419
AC024475.1	lincRNA	up	RUNX1T1	protein_coding	down	0.85292	1	0.85292
AC036108.3	lincRNA	down	RYR3	protein_coding	down	0.91177	1	0.91177
LPP	protein_coding	down	SCARNA9	lincRNA	up	0.850665	1	0.850665
MIR7-3HG	lincRNA	down	SCG3	protein_coding	down	0.953559	1	0.953559
HAND2-AS1	lincRNA	down	SCN2B	protein_coding	down	0.888439	1	0.888439
AC009102.2	lincRNA	down	SCN2B	protein_coding	down	0.86568	1	0.86568
HAND2-AS1	lincRNA	down	SCN7A	protein_coding	down	0.963269	1	0.963269
AC009102.2	lincRNA	down	SCN7A	protein_coding	down	0.889015	1	0.889015
AC010776.2	lincRNA	down	SCN7A	protein_coding	down	0.887572	1	0.887572
AC011306.1	lincRNA	down	SCN7A	protein_coding	down	0.887315	1	0.887315
AC110491.1	lincRNA	down	SCN7A	protein_coding	down	0.879792	1	0.879792
MBNL1-AS1	lincRNA	down	SCN7A	protein_coding	down	0.878479	1	0.878479
MIR497HG	lincRNA	down	SCN7A	protein_coding	down	0.861	1	0.861
AL356489.2	lincRNA	down	SCN7A	protein_coding	down	0.856233	1	0.856233
AC036108.3	lincRNA	down	SCN7A	protein_coding	down	0.853252	1	0.853252
KCNMB2	protein_coding	down	SEMA5A-AS1	lincRNA	up	0.85044	1	0.85044
MIR7-3HG	lincRNA	down	SEZ6	protein_coding	down	0.95683	1	0.95683
LINC02078	lincRNA	down	SEZ6	protein_coding	down	0.917735	1	0.917735
LINC01976	lincRNA	down	SEZ6	protein_coding	down	0.880139	1	0.880139
AC022893.2	lincRNA	down	SEZ6	protein_coding	down	0.869275	1	0.869275
AC106820.2	lincRNA	up	SEZ6	protein_coding	down	0.863393	1	0.863393
AC103853.1	lincRNA	up	SGIP1	protein_coding	up	0.923498	1	0.923498
AL391097.1	lincRNA	up	SGIP1	protein_coding	up	0.919477	1	0.919477
RBMS3-AS2	lincRNA	up	SGIP1	protein_coding	up	0.908442	1	0.908442
AC090337.1	lincRNA	up	SGIP1	protein_coding	up	0.907165	1	0.907165
AP003086.3	lincRNA	up	SGIP1	protein_coding	up	0.904941	1	0.904941
AL645504.1	lincRNA	up	SGIP1	protein_coding	up	0.901633	1	0.901633
AC100800.1	lincRNA	up	SGIP1	protein_coding	up	0.897381	1	0.897381
AC024475.1	lincRNA	up	SGIP1	protein_coding	up	0.893296	1	0.893296
AL049647.1	lincRNA	up	SGIP1	protein_coding	up	0.891295	1	0.891295
AL049820.1	lincRNA	up	SGIP1	protein_coding	up	0.890964	1	0.890964
LPP-AS1	lincRNA	up	SGIP1	protein_coding	up	0.888668	1	0.888668
AC004988.1	lincRNA	up	SGIP1	protein_coding	up	0.888643	1	0.888643
AC098829.1	lincRNA	up	SGIP1	protein_coding	up	0.886979	1	0.886979
MIR181A1HG	lincRNA	up	SGIP1	protein_coding	up	0.886017	1	0.886017
AC110792.2	lincRNA	up	SGIP1	protein_coding	up	0.884617	1	0.884617
AC008277.1	lincRNA	up	SGIP1	protein_coding	up	0.884125	1	0.884125
AC092839.2	lincRNA	up	SGIP1	protein_coding	up	0.884102	1	0.884102
AC009542.1	lincRNA	up	SGIP1	protein_coding	up	0.884014	1	0.884014
AL353771.1	lincRNA	up	SGIP1	protein_coding	up	0.883192	1	0.883192
AC010401.1	lincRNA	up	SGIP1	protein_coding	up	0.882468	1	0.882468
AC110048.2	lincRNA	up	SGIP1	protein_coding	up	0.881272	1	0.881272
AC116158.1	lincRNA	up	SGIP1	protein_coding	up	0.880798	1	0.880798
AC087286.1	lincRNA	up	SGIP1	protein_coding	up	0.880701	1	0.880701
AC106801.1	lincRNA	up	SGIP1	protein_coding	up	0.879993	1	0.879993
AC108463.3	lincRNA	up	SGIP1	protein_coding	up	0.879302	1	0.879302
MYLK-AS2	lincRNA	up	SGIP1	protein_coding	up	0.878331	1	0.878331
CASC15	lincRNA	up	SGIP1	protein_coding	up	0.878161	1	0.878161
NBAT1	lincRNA	up	SGIP1	protein_coding	up	0.87812	1	0.87812
AL596218.1	lincRNA	up	SGIP1	protein_coding	up	0.878084	1	0.878084
AL445248.1	lincRNA	up	SGIP1	protein_coding	up	0.877395	1	0.877395
AC026401.1	lincRNA	up	SGIP1	protein_coding	up	0.876191	1	0.876191
AC018462.1	lincRNA	up	SGIP1	protein_coding	up	0.874854	1	0.874854
AC087286.2	lincRNA	up	SGIP1	protein_coding	up	0.873479	1	0.873479
AC004466.3	lincRNA	up	SGIP1	protein_coding	up	0.872795	1	0.872795
AC104462.1	lincRNA	up	SGIP1	protein_coding	up	0.872193	1	0.872193
AC026355.2	lincRNA	up	SGIP1	protein_coding	up	0.872099	1	0.872099
AC009303.3	lincRNA	up	SGIP1	protein_coding	up	0.871647	1	0.871647
MIR133A1HG	lincRNA	down	SGIP1	protein_coding	up	0.871464	1	0.871464
AC116903.2	lincRNA	up	SGIP1	protein_coding	up	0.871288	1	0.871288
COL5A1-AS1	lincRNA	up	SGIP1	protein_coding	up	0.871152	1	0.871152
AC079035.1	lincRNA	up	SGIP1	protein_coding	up	0.869649	1	0.869649
ENOX1-AS1	lincRNA	up	SGIP1	protein_coding	up	0.868961	1	0.868961
AL096869.2	lincRNA	up	SGIP1	protein_coding	up	0.868934	1	0.868934
AL357568.1	lincRNA	up	SGIP1	protein_coding	up	0.868782	1	0.868782
AL117190.1	lincRNA	up	SGIP1	protein_coding	up	0.866826	1	0.866826
EGOT	lincRNA	up	SGIP1	protein_coding	up	0.866477	1	0.866477
AC131956.2	lincRNA	up	SGIP1	protein_coding	up	0.863846	1	0.863846
AL360091.3	lincRNA	up	SGIP1	protein_coding	up	0.863845	1	0.863845
AC022001.2	lincRNA	up	SGIP1	protein_coding	up	0.863798	1	0.863798
AC007336.1	lincRNA	up	SGIP1	protein_coding	up	0.863667	1	0.863667
AC104984.3	lincRNA	up	SGIP1	protein_coding	up	0.863391	1	0.863391
AC096741.1	lincRNA	up	SGIP1	protein_coding	up	0.862891	1	0.862891
AC009269.2	lincRNA	up	SGIP1	protein_coding	up	0.862698	1	0.862698
AC104316.1	lincRNA	up	SGIP1	protein_coding	up	0.862067	1	0.862067
AP001381.1	lincRNA	up	SGIP1	protein_coding	up	0.861706	1	0.861706
AL117339.4	lincRNA	up	SGIP1	protein_coding	up	0.861384	1	0.861384
AC104170.2	lincRNA	up	SGIP1	protein_coding	up	0.8612	1	0.8612
HMGA2-AS1	lincRNA	up	SGIP1	protein_coding	up	0.860422	1	0.860422
AC012404.2	lincRNA	up	SGIP1	protein_coding	up	0.860294	1	0.860294
AC044781.1	lincRNA	up	SGIP1	protein_coding	up	0.86007	1	0.86007
AC010285.1	lincRNA	up	SGIP1	protein_coding	up	0.859995	1	0.859995
AC037487.2	lincRNA	up	SGIP1	protein_coding	up	0.859399	1	0.859399
CYYR1-AS1	lincRNA	up	SGIP1	protein_coding	up	0.859091	1	0.859091
AC027228.1	lincRNA	up	SGIP1	protein_coding	up	0.858941	1	0.858941
AC103739.2	lincRNA	up	SGIP1	protein_coding	up	0.858003	1	0.858003
AC096708.2	lincRNA	up	SGIP1	protein_coding	up	0.857181	1	0.857181
CACNA1C-AS4	lincRNA	up	SGIP1	protein_coding	up	0.857047	1	0.857047
AC012213.3	lincRNA	up	SGIP1	protein_coding	up	0.856484	1	0.856484
FOXN3-AS2	lincRNA	up	SGIP1	protein_coding	up	0.856415	1	0.856415
PLCG1-AS1	lincRNA	up	SGIP1	protein_coding	up	0.856329	1	0.856329
AC016910.1	lincRNA	up	SGIP1	protein_coding	up	0.856301	1	0.856301
AC136424.2	lincRNA	up	SGIP1	protein_coding	up	0.856294	1	0.856294
AP002518.1	lincRNA	up	SGIP1	protein_coding	up	0.855822	1	0.855822
COL4A2-AS2	lincRNA	up	SGIP1	protein_coding	up	0.855711	1	0.855711
AC110769.1	lincRNA	up	SGIP1	protein_coding	up	0.855524	1	0.855524
AF178030.1	lincRNA	up	SGIP1	protein_coding	up	0.8541	1	0.8541
AC131182.1	lincRNA	up	SGIP1	protein_coding	up	0.853903	1	0.853903
AP005131.1	lincRNA	up	SGIP1	protein_coding	up	0.853612	1	0.853612
AL513188.1	lincRNA	up	SGIP1	protein_coding	up	0.85359	1	0.85359
AC018946.1	lincRNA	up	SGIP1	protein_coding	up	0.85354	1	0.85354
AC130650.1	lincRNA	up	SGIP1	protein_coding	up	0.853189	1	0.853189
AC009480.1	lincRNA	up	SGIP1	protein_coding	up	0.853126	1	0.853126
AF127577.2	lincRNA	up	SGIP1	protein_coding	up	0.852788	1	0.852788
AC022973.2	lincRNA	up	SGIP1	protein_coding	up	0.852784	1	0.852784
SALRNA2	lincRNA	up	SGIP1	protein_coding	up	0.852636	1	0.852636
CD44-AS1	lincRNA	up	SGIP1	protein_coding	up	0.852204	1	0.852204
MRTFA-AS1	lincRNA	up	SGIP1	protein_coding	up	0.851579	1	0.851579
DOCK4-AS1	lincRNA	up	SGIP1	protein_coding	up	0.851533	1	0.851533
AL359094.1	lincRNA	up	SGIP1	protein_coding	up	0.85144	1	0.85144
AL023581.1	lincRNA	up	SGIP1	protein_coding	up	0.851434	1	0.851434
AC025030.2	lincRNA	up	SGIP1	protein_coding	up	0.850556	1	0.850556
AP001001.1	lincRNA	up	SGIP1	protein_coding	up	0.850493	1	0.850493
AL357078.3	lincRNA	up	SGIP1	protein_coding	up	0.850255	1	0.850255
PRKG1-AS1	lincRNA	up	SGIP1	protein_coding	up	0.850024	1	0.850024
MIR7-3HG	lincRNA	down	SHISA7	protein_coding	down	0.955715	1	0.955715
LINC01976	lincRNA	down	SHISA7	protein_coding	down	0.895956	1	0.895956
LINC02078	lincRNA	down	SHISA7	protein_coding	down	0.881872	1	0.881872
AC087379.1	lincRNA	down	SLC26A2	protein_coding	down	0.914188	1	0.914188
AL513217.1	lincRNA	down	SLC2A4	protein_coding	down	0.878531	1	0.878531
AC002398.2	lincRNA	down	SLC2A4	protein_coding	down	0.87039	1	0.87039
AL355607.1	lincRNA	down	SLC2A4	protein_coding	down	0.865958	1	0.865958
AF001548.1	lincRNA	down	SLC2A4	protein_coding	down	0.865332	1	0.865332
AC021739.4	lincRNA	up	SLC30A4	protein_coding	down	0.912892	1	0.912892
AC006460.1	lincRNA	up	SLC30A4	protein_coding	down	0.911584	1	0.911584
AL023584.2	lincRNA	up	SLC30A4	protein_coding	down	0.911077	1	0.911077
AC044840.1	lincRNA	up	SLC30A4	protein_coding	down	0.910589	1	0.910589
AP002518.1	lincRNA	up	SLC30A4	protein_coding	down	0.907715	1	0.907715
AC044781.1	lincRNA	up	SLC30A4	protein_coding	down	0.905839	1	0.905839
AL360091.3	lincRNA	up	SLC30A4	protein_coding	down	0.90235	1	0.90235
AF178030.1	lincRNA	up	SLC30A4	protein_coding	down	0.900095	1	0.900095
MIR133A1HG	lincRNA	down	SLC30A4	protein_coding	down	0.899602	1	0.899602
ITGB5-AS1	lincRNA	up	SLC30A4	protein_coding	down	0.899508	1	0.899508
PRICKLE2-AS3	lincRNA	up	SLC30A4	protein_coding	down	0.898722	1	0.898722
AC022973.3	lincRNA	up	SLC30A4	protein_coding	down	0.898254	1	0.898254
KCNMA1-AS3	lincRNA	up	SLC30A4	protein_coding	down	0.897565	1	0.897565
AC022973.4	lincRNA	up	SLC30A4	protein_coding	down	0.893447	1	0.893447
AC136424.2	lincRNA	up	SLC30A4	protein_coding	down	0.892409	1	0.892409
AP003696.1	lincRNA	up	SLC30A4	protein_coding	down	0.892404	1	0.892404
AC016866.2	lincRNA	up	SLC30A4	protein_coding	down	0.891667	1	0.891667
AC020611.2	lincRNA	up	SLC30A4	protein_coding	down	0.891482	1	0.891482
AC008534.1	lincRNA	up	SLC30A4	protein_coding	down	0.890956	1	0.890956
HMGA2-AS1	lincRNA	up	SLC30A4	protein_coding	down	0.889829	1	0.889829
AC009542.1	lincRNA	up	SLC30A4	protein_coding	down	0.889608	1	0.889608
AP000487.2	lincRNA	up	SLC30A4	protein_coding	down	0.889077	1	0.889077
AP003086.3	lincRNA	up	SLC30A4	protein_coding	down	0.887271	1	0.887271
DOCK9-AS1	lincRNA	up	SLC30A4	protein_coding	down	0.886303	1	0.886303
AC010401.1	lincRNA	up	SLC30A4	protein_coding	down	0.885795	1	0.885795
AL121957.1	lincRNA	up	SLC30A4	protein_coding	down	0.885703	1	0.885703
AL645504.1	lincRNA	up	SLC30A4	protein_coding	down	0.885695	1	0.885695
LINC00862	lincRNA	up	SLC30A4	protein_coding	down	0.883936	1	0.883936
AL162253.1	lincRNA	up	SLC30A4	protein_coding	down	0.882714	1	0.882714
MEG8	lincRNA	up	SLC30A4	protein_coding	down	0.882421	1	0.882421
AC133644.2	lincRNA	down	SLC30A4	protein_coding	down	0.882352	1	0.882352
AC072022.1	lincRNA	up	SLC30A4	protein_coding	down	0.882295	1	0.882295
AC022540.1	lincRNA	up	SLC30A4	protein_coding	down	0.881987	1	0.881987
AC083806.2	lincRNA	up	SLC30A4	protein_coding	down	0.881332	1	0.881332
AL139095.4	lincRNA	up	SLC30A4	protein_coding	down	0.88116	1	0.88116
ARNTL2-AS1	lincRNA	up	SLC30A4	protein_coding	down	0.878886	1	0.878886
AL445248.1	lincRNA	up	SLC30A4	protein_coding	down	0.878625	1	0.878625
AC020661.3	lincRNA	up	SLC30A4	protein_coding	down	0.878014	1	0.878014
AC103739.2	lincRNA	up	SLC30A4	protein_coding	down	0.876084	1	0.876084
AC069542.1	lincRNA	up	SLC30A4	protein_coding	down	0.875868	1	0.875868
AC099550.1	lincRNA	up	SLC30A4	protein_coding	down	0.874411	1	0.874411
AC055764.1	lincRNA	up	SLC30A4	protein_coding	down	0.874149	1	0.874149
AL158166.2	lincRNA	up	SLC30A4	protein_coding	down	0.873953	1	0.873953
AC018878.1	lincRNA	up	SLC30A4	protein_coding	down	0.873486	1	0.873486
AC022778.1	lincRNA	up	SLC30A4	protein_coding	down	0.872587	1	0.872587
AC026894.1	lincRNA	up	SLC30A4	protein_coding	down	0.872479	1	0.872479
AC096708.2	lincRNA	up	SLC30A4	protein_coding	down	0.872173	1	0.872173
AL049820.1	lincRNA	up	SLC30A4	protein_coding	down	0.871176	1	0.871176
AC100800.1	lincRNA	up	SLC30A4	protein_coding	down	0.870945	1	0.870945
RDH10-AS1	lincRNA	up	SLC30A4	protein_coding	down	0.870873	1	0.870873
AP001381.1	lincRNA	up	SLC30A4	protein_coding	down	0.869074	1	0.869074
AC022395.1	lincRNA	up	SLC30A4	protein_coding	down	0.868974	1	0.868974
AL031770.1	lincRNA	up	SLC30A4	protein_coding	down	0.868389	1	0.868389
AC110792.2	lincRNA	up	SLC30A4	protein_coding	down	0.867601	1	0.867601
AL080317.2	lincRNA	up	SLC30A4	protein_coding	down	0.867302	1	0.867302
AC020661.2	lincRNA	up	SLC30A4	protein_coding	down	0.866925	1	0.866925
CFAP44-AS1	lincRNA	up	SLC30A4	protein_coding	down	0.866245	1	0.866245
AC073569.1	lincRNA	up	SLC30A4	protein_coding	down	0.864308	1	0.864308
DPYD-AS1	lincRNA	up	SLC30A4	protein_coding	down	0.864305	1	0.864305
FBXW7-AS1	lincRNA	up	SLC30A4	protein_coding	down	0.864157	1	0.864157
AC007298.1	lincRNA	up	SLC30A4	protein_coding	down	0.862499	1	0.862499
AL513188.1	lincRNA	up	SLC30A4	protein_coding	down	0.862331	1	0.862331
AP000763.3	lincRNA	up	SLC30A4	protein_coding	down	0.861773	1	0.861773
PLCG1-AS1	lincRNA	up	SLC30A4	protein_coding	down	0.861598	1	0.861598
IGF2BP2-AS1	lincRNA	up	SLC30A4	protein_coding	down	0.861444	1	0.861444
PAPPA-AS2	lincRNA	up	SLC30A4	protein_coding	down	0.860979	1	0.860979
AC020913.3	lincRNA	up	SLC30A4	protein_coding	down	0.860487	1	0.860487
AC026782.2	lincRNA	up	SLC30A4	protein_coding	down	0.859102	1	0.859102
AC002064.2	lincRNA	up	SLC30A4	protein_coding	down	0.858028	1	0.858028
AC012404.2	lincRNA	up	SLC30A4	protein_coding	down	0.857971	1	0.857971
AL117190.1	lincRNA	up	SLC30A4	protein_coding	down	0.85722	1	0.85722
AC024475.1	lincRNA	up	SLC30A4	protein_coding	down	0.856694	1	0.856694
AC007731.3	lincRNA	up	SLC30A4	protein_coding	down	0.855819	1	0.855819
AC008121.2	lincRNA	up	SLC30A4	protein_coding	down	0.855781	1	0.855781
AC104316.1	lincRNA	up	SLC30A4	protein_coding	down	0.855652	1	0.855652
AL359693.1	lincRNA	up	SLC30A4	protein_coding	down	0.855505	1	0.855505
AC016910.1	lincRNA	up	SLC30A4	protein_coding	down	0.855191	1	0.855191
INHBA-AS1	lincRNA	up	SLC30A4	protein_coding	down	0.854821	1	0.854821
PRKG1-AS1	lincRNA	up	SLC30A4	protein_coding	down	0.854363	1	0.854363
AC090673.1	lincRNA	up	SLC30A4	protein_coding	down	0.854199	1	0.854199
AC018682.1	lincRNA	up	SLC30A4	protein_coding	down	0.853029	1	0.853029
AC018462.1	lincRNA	up	SLC30A4	protein_coding	down	0.852974	1	0.852974
CARNMT1-AS1	lincRNA	up	SLC30A4	protein_coding	down	0.85289	1	0.85289
AC005828.1	lincRNA	up	SLC30A4	protein_coding	down	0.852759	1	0.852759
AC007314.1	lincRNA	up	SLC30A4	protein_coding	down	0.851683	1	0.851683
AC011595.1	lincRNA	up	SLC30A4	protein_coding	down	0.851401	1	0.851401
AC012358.1	lincRNA	up	SLC30A4	protein_coding	down	0.850959	1	0.850959
MYLK-AS2	lincRNA	up	SLC30A4	protein_coding	down	0.850765	1	0.850765
DOCK4-AS1	lincRNA	up	SLC30A4	protein_coding	down	0.850645	1	0.850645
HIF1A-AS2	lincRNA	up	SLC30A4	protein_coding	down	0.850555	1	0.850555
AC016705.1	lincRNA	up	SLC4A1	protein_coding	down	0.933625	1	0.933625
AC139099.2	lincRNA	down	SLC4A1	protein_coding	down	0.928548	1	0.928548
AL008638.6	lincRNA	up	SLC4A1	protein_coding	down	0.921096	1	0.921096
AC073934.1	lincRNA	up	SLC4A1	protein_coding	down	0.917823	1	0.917823
LINC02554	lincRNA	down	SLC4A1	protein_coding	down	0.910142	1	0.910142
AC004835.1	lincRNA	up	SLC4A1	protein_coding	down	0.909279	1	0.909279
AL355390.1	lincRNA	up	SLC4A1	protein_coding	down	0.906967	1	0.906967
LINC01907	lincRNA	down	SLC4A1	protein_coding	down	0.906838	1	0.906838
AC026688.2	lincRNA	down	SLC4A1	protein_coding	down	0.903503	1	0.903503
AC145207.7	lincRNA	up	SLC4A1	protein_coding	down	0.902895	1	0.902895
AP002784.1	lincRNA	up	SLC4A1	protein_coding	down	0.900509	1	0.900509
LINC01391	lincRNA	up	SLC4A1	protein_coding	down	0.899757	1	0.899757
AC018682.2	lincRNA	up	SLC4A1	protein_coding	down	0.897503	1	0.897503
AP004147.1	lincRNA	up	SLC4A1	protein_coding	down	0.896499	1	0.896499
AC126614.1	lincRNA	up	SLC4A1	protein_coding	down	0.888979	1	0.888979
AQP4-AS1	lincRNA	down	SLC4A1	protein_coding	down	0.886555	1	0.886555
LINC01532	lincRNA	down	SLC4A1	protein_coding	down	0.885385	1	0.885385
LINC02547	lincRNA	up	SLC4A1	protein_coding	down	0.884854	1	0.884854
AL117328.2	lincRNA	up	SLC4A1	protein_coding	down	0.882362	1	0.882362
AL772337.2	lincRNA	down	SLC4A1	protein_coding	down	0.881765	1	0.881765
AC084346.1	lincRNA	up	SLC4A1	protein_coding	down	0.879467	1	0.879467
DBET	lincRNA	up	SLC4A1	protein_coding	down	0.879295	1	0.879295
AL096828.1	lincRNA	up	SLC4A1	protein_coding	down	0.87695	1	0.87695
AC026469.1	lincRNA	down	SLC4A1	protein_coding	down	0.873775	1	0.873775
GPRACR	lincRNA	down	SLC4A1	protein_coding	down	0.873604	1	0.873604
AC109479.3	lincRNA	up	SLC4A1	protein_coding	down	0.872696	1	0.872696
AC122719.2	lincRNA	up	SLC4A1	protein_coding	down	0.87259	1	0.87259
AC037441.1	lincRNA	up	SLC4A1	protein_coding	down	0.872264	1	0.872264
AC093642.1	lincRNA	down	SLC4A1	protein_coding	down	0.87111	1	0.87111
PGM5P4-AS1	lincRNA	down	SLC4A1	protein_coding	down	0.870232	1	0.870232
AC023906.2	lincRNA	down	SLC4A1	protein_coding	down	0.869872	1	0.869872
AC245884.1	lincRNA	up	SLC4A1	protein_coding	down	0.866337	1	0.866337
AL157400.1	lincRNA	up	SLC4A1	protein_coding	down	0.863164	1	0.863164
NAMA	lincRNA	up	SLC4A1	protein_coding	down	0.862272	1	0.862272
LINC02348	lincRNA	up	SLC4A1	protein_coding	down	0.862213	1	0.862213
C12orf80	lincRNA	up	SLC4A1	protein_coding	down	0.861338	1	0.861338
LINC01701	lincRNA	up	SLC4A1	protein_coding	down	0.859927	1	0.859927
AC084064.1	lincRNA	down	SLC4A1	protein_coding	down	0.859911	1	0.859911
AC090844.3	lincRNA	up	SLC4A1	protein_coding	down	0.858145	1	0.858145
LINC01257	lincRNA	up	SLC4A1	protein_coding	down	0.856975	1	0.856975
AL512604.3	lincRNA	up	SLC4A1	protein_coding	down	0.856746	1	0.856746
AC087855.2	lincRNA	down	SLC4A1	protein_coding	down	0.853433	1	0.853433
AC087379.1	lincRNA	down	SLC4A4	protein_coding	down	0.877724	1	0.877724
LINC00974	lincRNA	down	SLC4A4	protein_coding	down	0.861034	1	0.861034
PALM2	protein_coding	up	SLC6A1-AS1	lincRNA	up	0.883849	1	0.883849
AC022893.2	lincRNA	down	SLC7A14	protein_coding	down	0.86527	1	0.86527
SGIP1	protein_coding	up	SLC8A1-AS1	lincRNA	up	0.91134	1	0.91134
GRIK1	protein_coding	down	SLC8A1-AS1	lincRNA	up	0.898958	1	0.898958
LPP	protein_coding	down	SLC8A1-AS1	lincRNA	up	0.883338	1	0.883338
LRRC7	protein_coding	down	SLC8A1-AS1	lincRNA	up	0.870471	1	0.870471
MIR7-3HG	lincRNA	down	SLITRK1	protein_coding	down	0.938491	1	0.938491
LINC01976	lincRNA	down	SLITRK1	protein_coding	down	0.907351	1	0.907351
AC022893.2	lincRNA	down	SLITRK1	protein_coding	down	0.901234	1	0.901234
LINC02078	lincRNA	down	SLITRK1	protein_coding	down	0.872506	1	0.872506
AC009139.1	lincRNA	up	SLITRK1	protein_coding	down	0.850132	1	0.850132
GRIK1	protein_coding	down	SMAD1-AS2	lincRNA	up	0.89161	1	0.89161
KCTD4	protein_coding	down	SMAD5-AS1	lincRNA	up	0.887698	1	0.887698
GRIK1	protein_coding	down	SMAD5-AS1	lincRNA	up	0.859298	1	0.859298
MMS22L	protein_coding	up	SMAD5-AS1	lincRNA	up	0.858672	1	0.858672
KCTD4	protein_coding	down	SND1-IT1	lincRNA	up	0.882422	1	0.882422
GLRA1	protein_coding	up	SND1-IT1	lincRNA	up	0.86513	1	0.86513
MBNL1-AS1	lincRNA	down	SORBS1	protein_coding	down	0.91172	1	0.91172
AL356489.2	lincRNA	down	SORBS1	protein_coding	down	0.887225	1	0.887225
AC009102.2	lincRNA	down	SORBS1	protein_coding	down	0.877951	1	0.877951
AL513217.1	lincRNA	down	SORBS1	protein_coding	down	0.867611	1	0.867611
[truncated: 266 more rows]
